1 **Ecosystem size-induced environmental fluctuations affect the temporal dynamics of**  
2 **community assembly mechanisms**

3

4 Raven L. Bier<sup>1,2\*</sup>, Máté Vass<sup>1,3\*</sup>, Anna J. Székely<sup>1,4</sup>, Silke Langenheder<sup>1,5</sup>

5 <sup>1</sup>Department of Ecology and Genetics/Limnology, Uppsala University, Norbyvägen 18 D, 75236  
6 Uppsala, Sweden

7 <sup>2</sup>[rbier@srel.uga.edu](mailto:rbier@srel.uga.edu)

8 <sup>3</sup>[mate.vass@umu.se](mailto:mate.vass@umu.se)

9 <sup>4</sup>[anna.szekely@slu.se](mailto:anna.szekely@slu.se)

10 <sup>5</sup>[silke.langenheder@ebc.uu.se](mailto:silke.langenheder@ebc.uu.se)

11 \* These authors contributed equally to this work

12

13 Corresponding Author: Raven Bier, Savannah River Ecology Laboratory, University of Georgia,  
14 PO Drawer E, Aiken SC 29802 USA. Phone: +1 803-725-9726, Email: [rbier@srel.uga.edu](mailto:rbier@srel.uga.edu)

15

16 Competing Interests: The authors declare no competing interests.

17

18

19

20

21

22

23 **Abstract**

24 Understanding processes that determine community membership and abundance is important for  
25 many fields from theoretical community ecology to conservation. However, spatial community  
26 studies are often conducted only at a single timepoint despite the known influence of temporal  
27 variability on community assembly processes. Here we used a spatiotemporal study to determine  
28 how environmental fluctuation differences induced by mesocosm volumes (larger volumes were  
29 more stable) influence assembly processes of aquatic bacterial metacommunities along a press  
30 disturbance gradient. By combining path analysis and network approaches, we found mesocosm  
31 size categories had distinct relative influences of assembly process and environmental factors  
32 that determined spatiotemporal bacterial community composition, including dispersal and  
33 species sorting by conductivity. These processes depended on, but were not affected  
34 proportionately by, mesocosm size. Low fluctuation, large mesocosms primarily developed  
35 through the interplay of species sorting that became more important over time and transient  
36 priority effects as evidenced by more time-delayed associations. High fluctuation, small  
37 mesocosms had regular disruptions to species sorting and greater importance of ecological drift  
38 and dispersal limitation indicated by lower richness and higher taxa replacement. Together, these  
39 results emphasize that environmental fluctuations influence ecosystems over time and its impacts  
40 are modified by biotic properties intrinsic to ecosystem size.

41

42

43

44

45

## 46 **Introduction**

47           The community composition of both micro- and macro-organisms at a given point in  
48 space and time results from the interaction of multiple assembly processes, including ecological  
49 drift, species sorting (environmental filtering), dispersal, and speciation (1-5). Most  
50 observational metacommunity studies, however, focus only on spatial snapshots without  
51 considering temporal dynamics of community assembly and association networks, or historical  
52 contingencies (2, 6). Hence, we still lack knowledge about the underlying mechanisms and  
53 regulating factors that temporal dynamics encompass.

54           When species sorting assembles communities, their composition tracks changes in  
55 environmental conditions that occur in time and space (2, 7). However, environmental tracking  
56 can be hindered or disrupted (8). Such asynchrony can lead to historical contingencies by priority  
57 effects (e.g., (8, 9), which can occur during early community formation or when communities re-  
58 assemble following perturbation. An important consequence of priority effects is that they  
59 impede or delay environmental tracking enacted by species sorting.

60           Environmental changes may influence temporal community assembly processes and the  
61 strength of this can be regulated by ecosystem size (e.g., 6). Studies have shown that microbial  
62 communities exposed to disturbances are initially, and often to a strong degree, stochastically  
63 assembled, but that the importance of species sorting increases later during community re-  
64 assembly as more species from the regional species pool arrive (11-14). Rapidly fluctuating  
65 environmental conditions, however, may continuously disrupt environmental tracking by  
66 reducing opportunities for species sorting to select and shape local communities before the  
67 environmental conditions change again. This might promote coexistence of species with different  
68 niche optima (20-22) and, thus, reduce beta diversity (16), or could cause extinctions that bolster

69 dispersal limitation and priority effects (23). Nevertheless, many studies happen in controlled  
70 settings; thus, we lack knowledge on the temporal dynamics of these processes within larger,  
71 more complex habitats which track environmental changes (2, 17). Disturbance strength may  
72 uniquely affect microbial communities in ecosystems of different sizes as ecosystem size may  
73 influence assembly processes by increasing habitat heterogeneity, community abundance (6, 18,  
74 19), and the pace at which communities track environmental changes. For instance, communities  
75 may experience different environmental variability including press disturbances (e.g., climate  
76 warming, eutrophication, or saltwater incursion), periodic and stochastic environmental  
77 fluctuations, where the latter may influence community assembly in response to the former over  
78 time and space.

79         Here, we implemented an experiment with freshwater bacterial metacommunities to test  
80 how different ecosystem size-induced environmental fluctuations influence the temporal  
81 dynamics of community assembly mechanisms. We collected a 64-day time series from  
82 mesocosms that allowed bacterial communities sufficient time to experience natural  
83 environmental fluctuations. Specifically, we set-up a natural experimental landscape with  
84 mesocosms containing identical lake water that differed in volume, which induced differences in  
85 environmental fluctuation intensity among the mesocosms. We created a press disturbance by  
86 applying a salinity gradient to each set of mesocosm volumes as it has been shown that salinity  
87 affects bacterial communities in many ecosystems (e.g., (10-13)). We hypothesized that the  
88 importance of species sorting would increase over time in local communities of larger  
89 mesocosms that experience relatively minor environmental fluctuations because their  
90 communities will have sufficient time for species selection in response to the initial salinity.  
91 Second, other environmental changes occurring in mesocosms would be slow in large



92 mesocosms and this would allow time for taxa to be recruited from internal and external  
93 dispersal sources and to become active. We expected that species sorting related to salinity  
94 differences across communities, i.e., at the metacommunity scale, promotes recruitment of taxa  
95 best suited to the salinity. Last, we hypothesized that stochastic and/or dispersal-related assembly  
96 processes should be more important in small mesocosms where communities experience strong  
97 environmental fluctuations that continually disrupt environmental tracking. We combined  
98 quantitative path analysis methods that aim to estimate metacommunity processes with a network  
99 approach that identifies environmental tracking patterns through local and time-delayed co-  
100 occurrences to provide insights into temporal dynamics of microbial ecosystems (14).

101

## 102 **Methods**

### 103 *Experimental set-up*

104 Three different sizes (24.5, 70, or 200 L) of hard-shell polyethylene mesocosms were  
105 arranged in a field beside Lake Erken (16 per size category) and filled with 0.1 mm filtered lake  
106 water from Lake Erken in Sweden (59°51'N 18°35'E) (water properties in Supplementary  
107 Information). Mesocosms were seeded with 1 L of sieved and mixed surface sediments collected  
108 from Lake Erken at ~0.5 m water depth.

109 To induce species sorting with a press disturbance, a salinity gradient was created within  
110 each mesocosm size category using nitrate- and phosphate-free sea salt (Red Sea Aquatics Ltd,  
111 Verneuil-sur-Avre, France) and ranged from freshwater (0 ‰) to 6 ‰ with 0.4 ‰ increments  
112 (rationale for range in Supplementary Information). Mesocosm water surface area and volume  
113 were proportional such that air or rain dispersal was proportional across size classes. Mesocosm

114 sediment was also a recruitment source (15-17). Equal mesocosm bottom surface areas allowed  
115 for equal recruitment independent of fluctuation category.

### 116 *Monitoring and sampling*

117 Mesocosms were monitored on days 1, 2, and 4, and then every fourth day for 64 days  
118 from July to September 2016. Monitoring included depth profiles of conductivity (to measure  
119 salinity changes) and temperature, and depth integrated pH, chlorophyll-*a*, and colored dissolved  
120 organic matter (CDOM) fluorescence (see Supplementary Information for details). Weather data  
121 from Svanberga, Sweden (0.87 km southwest of the site) included daily precipitation and hourly  
122 air temperature (Swedish Meteorological and Hydrological Institute). Every eighth day, water  
123 was collected for total organic carbon (TOC), total nitrogen (TN), and total phosphorus (TP) and  
124 analyzed using established methods (18).

125 Water samples for enumerating microorganism cells were collected simultaneously with  
126 bacterial community composition (below) and preserved with sterile formaldehyde to 2.5 % (19).  
127 Samples were stained with SYTO™ 13 Green Fluorescent Nucleic Acid Stain (ThermoFisher  
128 Scientific), counted (CyFlow Space flow cytometer, Partec, Münster, Germany) and analyzed  
129 using FlowingSoft software (Perttu Terho). Total community size was calculated as cell  
130 abundance ( $\text{mL}^{-1}$ ) multiplied by mesocosm volume.

### 131 *Bacterial community composition*

132 Mesocosm water was collected on days 1, 2, 4, 8 and every 8<sup>th</sup> day thereafter for 64 days  
133 to assess community composition through 16S rRNA amplicon sequencing to specifically detect  
134 active members (20). Depth integrated 0.5 L water samples, and air and rain immigration  
135 samples (see Supplementary Information), were collected and filtered onto 0.2  $\mu\text{m}$  pore-size  
136 filters (47 mm Supor-200 filters, Pall Corporation, Hampshire, UK) until 5 minutes or 0.5 L

137 volume was reached. Filters were flash-frozen in liquid nitrogen and stored at  $-80^{\circ}\text{C}$ . DNA from  
138 initial lake water and sediment used in the experiment were sampled to learn initial communities  
139 and seed banks.

140 Nucleic acids were extracted using a modified protocol from Easy-DNA<sup>TM</sup> kit  
141 (Invitrogen, Carlsbad, CA, USA). See Supplementary Information and DOI for a detailed  
142 protocol ([dx.doi.org/10.17504/protocols.io.xekfjcw](https://dx.doi.org/10.17504/protocols.io.xekfjcw)). Samples were submitted to SNP&SEQ  
143 Technology platform at SciLife in Uppsala, Sweden for two Illumina MiSeq PE300bp  
144 sequencing runs with v3 chemistry.

#### 145 *Data processing*

146 Sequencing resulted in 35.6 million paired reads from 609 demultiplexed samples  
147 including 12 extraction and PCR negatives. Primers were removed from sequences using  
148 cutadapt v 2.7 ref. (21). The DADA2 pipeline (22) was used for sequence processing and  
149 taxonomy assignment of Amplicon Sequence Variants (ASVs) using the SILVA v. 138.1  
150 reference database (23) (Supplementary Information, Table S1).

151 For beta diversity analyses, ASVs with counts less than 10 were removed and samples  
152 were subsampled to a minimum of 5 028 reads, retaining 7 983 unique ASVs. Samples not  
153 meeting the 5 028 reads requirement were excluded (Table S2). Both alpha and beta diversity  
154 datasets represented 99 % coverage. Raw sequences are available in the European Nucleotide  
155 Archive (study accession number PRJEB26595).

#### 156 *Statistical analyses*

157 Statistical analyses were conducted in R (v3.4.3 and v4.0.2) ref. (24) with package  
158 “vegan” (25) unless otherwise specified.

#### 159 Fluctuation magnitudes among mesocosm sizes

160 For each environmental variable, fluctuations data were analyzed using the mean of  
161 absolute differences of mesocosms in a size category between one date and the previous  
162 sampling date. For variables with depth profiles (conductivity and temperature), the absolute  
163 difference at each depth was used to calculate the mean change per mesocosm. The  
164 environmental variables dataset is in the DiVA repository (26). To determine if the magnitude of  
165 changes differed between mesocosm sizes over time, nonparametric tests for repeated measures  
166 with an ANOVA-type statistic (ATS) were used (R package and function *nparLD*, ref. (27)).  
167 Mesocosms were assessed using principal components analysis (PCA) of original and absolute  
168 changes of environmental variables (both log-transformed) and fit with environmental vectors  
169 (Fig. S2).

#### 170 Community composition, diversity, and recruitment

171 Non-metric multidimensional scaling (NMDS) with Bray-Curtis dissimilarities was used  
172 to visualize bacterial community composition and environmental variables. Shannon's index and  
173 Pielou's evenness were calculated and richness was estimated using the package "breakaway"  
174 (28). Temporal beta diversity differences in each mesocosm were evaluated by comparing each  
175 community with the previous using Jaccard pairwise dissimilarity values. Dissimilarity was  
176 partitioned between taxa turnover (taxa replacement) and community nestedness (chronological  
177 subsets of taxa) using package "betapart" v1.5.2 ref. (29). Variation from each partition captured  
178 by mesocosm size was compared using PERMANOVA tests (30) with function *adonis* and 999  
179 permutations.

180 Recruitment was evaluated by pooling each mesocosm's active ASVs across days; ASVs  
181 present on day one were removed from the pool leaving those recruited during the experiment.  
182 Recruited ASVs were matched with their source seed bank(s) based on DNA from sediment,

183 initial lake water, air, and rain. Sources for unmatched ASVs were considered unknown. For  
184 each mesocosm, the percent of recruited ASVs was calculated, split into each source, and  
185 examined across the salinity gradient using Pearson's correlations.

#### 186 Path analysis

187 To detect drivers of metacommunity dynamics, a spatiotemporal path analysis was used  
188 (31). This method calculates dissimilarity for all community pairs sampled over time and space  
189 and estimates, as individual paths on this beta-diversity measure, the influences of spatial  
190 distance ( $\Delta x$ ), temporal distance ( $\Delta t$ ), environmental distance ( $\Delta E$ ), mean community size ( $\langle J \rangle$ ,  
191 cell abundance multiplied by mesocosm volume), and absolute differences in community size  
192 ( $\Delta J$ ) and taxa richness ( $\Delta S$ ). Nestedness between sites should explain a positive link between  
193 differences in community size and richness thereby increasing community dissimilarity (31).  
194 Bray-Curtis dissimilarity was used for the community dissimilarity matrix ( $\beta_{bc}$ ). A permutation-  
195 based approach adjusted with Benjamini-Hochberg procedure indicated path significance. Model  
196 fit was assessed with the standardized root mean square residual (SRMR). The analysis was run  
197 separately for each mesocosm size using the days required for network analysis (Supplementary  
198 Information), with the *sem* function in R package "lavaan" (32).

#### 199 Network analysis

200 To uncover local and time-delayed microbial associations and the extrinsic effects of  
201 environmental variables on bacteria, extended local similarity analysis (eLSA) was applied (14).  
202 Given our temporal data, this approach detects undirected associations (e.g., without time  
203 delays), and associations where the change of one factor (a taxon or environmental variable)  
204 chronologically leads or follows another factor. For a link between taxa and environmental  
205 variables, the association type (delayed or non-delayed) can indicate tracking that is time-lagged

206 due to transient priority effects, or simultaneous through species sorting, respectively.  
207 Associations were determined for each mesocosm size using eLSA wherein mesocosms from  
208 each size category were used as fluctuation level replicates ( $n = 16$ ). Because of the within- and  
209 across-size variability of bacterial communities (e.g., significant differences in taxa richness), we  
210 selected and analyzed only the core bacterial groups for each mesocosm size to make it  
211 comparable. Hence, networks used the 50 most abundant ASVs from each size category. eLSA  
212 (v1.0.2) was run over eight sampling points, allowing for local similarity (LS) correlations  
213 between samples taken eight days apart ( $d = 1$ ). LS correlations (LS value  $\geq 0.05$ ;  $Q \leq 0.01$ ) were  
214 visualized in Cytoscape v3.8.2 (33). Network characteristics were calculated using the Cytoscape  
215 plugin NetworkAnalyzer (34). See Supplementary Information for details on sample selection,  
216 dominant ASV abundances, and statistics.

## 217 **Results**

### 218 *Environmental fluctuations in mesocosms*

219 Environmental variable fluctuations corresponded with mesocosm size and reflected  
220 rainfall and air temperature (Fig. S1, Table S3, Fig. S2). Size categories experienced  
221 significantly different conductivity and temperature fluctuations. After four days small and  
222 medium mesocosm conductivity fluctuated more than large mesocosms (Fig. S1, Table S3).  
223 Mean temperature fluctuation increased inversely with mesocosm size (Table S3). Mesocosm  
224 depth profiles showed stable conductivity, but temperature decreased with depth in medium and  
225 large mesocosms (Fig. S3).

226 Mesocosm sizes differed in nutrient concentrations and the absolute change of other  
227 environmental variables (chl-*a*, CDOM, pH, TN, TOC, TP and cell abundance, Table S3) and  
228 most pairwise comparisons showed that the degree of change differed significantly between sizes

229 with the greatest changes in small mesocosms. Absolute changes between sampling dates and  
230 individual timepoints grouped according to size (Fig. S2). Measured nutrients and conductivity  
231 positively correlated with decreasing mesocosm sizes (environmental vector correlations,  $p <$   
232  $0.05$ ). For water temperature, sampling date was more influential than mesocosm size. Cell  
233 abundances (cells  $\text{mL}^{-1}$ ) increased over time and was highest in small and medium mesocosms  
234 (ATS,  $p < 0.001$ , Fig. S4A). From day 24, total community abundance per mesocosm was lower  
235 in small than medium and large mesocosms (ATS, all  $p < 0.002$ , Fig. S4B).

### 236 *Community composition, diversity, and recruitment*

237 Bacterial community composition shifted with time and initial conductivity in all  
238 mesocosm sizes (Fig. S5). Diversity indices (estimated richness, Pielou's evenness, Shannon's  
239 index) did not differ on the first day (two-way ANOVA, all  $p > 0.05$ ), but over time all three  
240 indices differed by mesocosm size (Fig. 1, repeated measures ANOVA, all overall  $p \leq 0.001$ ;  
241 pairwise Bonferroni adjusted). All sizes differed significantly in bacterial richness which was  
242 lowest in small and highest in large mesocosms (all  $p \leq 0.001$ ). The more evenly distributed  
243 ASV abundances in large mesocosms widened the separation in Shannon's index diversity  
244 between large and small or medium mesocosms, indicating a greater presence of dominant  
245 and/or rare taxa in smaller mesocosms (Fig. 1). Mesocosm size explained some variability in  
246 beta diversity from turnover (F model = 13,  $R^2 = 0.04$ ,  $p \leq 0.001$ ) with communities in small  
247 mesocosms experiencing higher turnover by taxa replacement than those in large mesocosms  
248 (Wilcoxon Test,  $W = 4276$ , Bonferroni  $p.adj. = 0.02$ , Fig. S6A). Statistically, mesocosm size did  
249 not explain variability in nestedness, although communities in large mesocosms trended towards  
250 greater nested species loss (Fig. S6B).

251 Recruited ASVs as a percentage of total unique ASVs, had weak negative correlations  
252 with the salinity press disturbance in small and large mesocosms ( $r = -0.35$  and  $-0.39$ ,  $p < 0.005$ ,  
253 respectively, Fig. S7). Less than 15 % of recruited ASVs in each mesocosm were attributed to a  
254 known source. In all mesocosm sizes, recruitment from water declined significantly with initial  
255 salinity (small:  $r = -0.90$ , medium:  $r = -0.85$ , large:  $r = -0.89$ , all  $p < 0.001$ ). Recruitment from  
256 sediment showed different patterns across salinity levels in small and large mesocosms: it  
257 decreased in small mesocosms and was unchanged in large mesocosms ( $r = -0.70$ ,  $p = 0.002$ ;  $r =$   
258  $0.45$ ,  $p = 0.08$ , respectively). Sediment was typically the largest recruitment source in the most  
259 saline mesocosms. Air and rain recruitment was related to salinity level only in the medium  
260 mesocosms where it was weakly positively correlated (air:  $r = 0.52$ ,  $p = 0.04$ , rain:  $r = 0.58$ ,  $p =$   
261  $0.02$ ).

## 262 *Path analysis*

263 Bacterial metacommunities in mesocosms of different sizes experienced disparate  
264 relative influences from species sorting by environmental variation, demographic stochasticity,  
265 and dispersal limitation (Fig. 2). The model fit for small mesocosms was roughly twice that of  
266 medium and large mesocosms (Fig. 2).

267 Species sorting ( $\Delta E$ ) had the most influential direct effect on community dissimilarity  
268 ( $\beta_{bc}$ ) (Fig. 2). This effect was strongest in small mesocosms and similar in medium and large  
269 mesocosms (sum of absolute standardized estimates 0.925, 0.773, and 0.766, respectively), but  
270 all sizes had significant environmental distance and community dissimilarity relationships  
271 (Tables S4-S6). Small mesocosms had five significant relationships between community  
272 dissimilarity and environmental variables (conductivity, temperature, chlorophyll-*a*, TOC, and  
273 TN); large mesocosms had three (conductivity, temperature, and chlorophyll-*a*), and medium



274 mesocosms had only conductivity. Conductivity correlated most strongly with community  
275 dissimilarity of medium, followed by large and small mesocosms. Significant correlations  
276 between temporal ( $\Delta t$ ) or spatial ( $\Delta x$ ) distance and environmental ( $\Delta E$ ) distance were positive  
277 and increased with mesocosm size. The indirect effect of time on community dissimilarity  
278 through species sorting was apparent with all measured variables except conductivity.

279         Demographic stochasticity was indicated by significant negative relationships between  
280 mean community size ( $\langle J \rangle$ ) and community dissimilarity in all mesocosm sizes (Fig. 2, Tables  
281 S4-S6). Small mesocosms had the strongest influence by demographic stochasticity. All  
282 mesocosm sizes had positive correlations between temporal distance and community  
283 dissimilarity indicating additional demographic stochasticity. Relationship strengths differed  
284 with size: temporal changes had the greatest influence in large, then small, then medium  
285 mesocosms.

286         Dispersal limitation shown as a positive correlation between geographic distance and  
287 community dissimilarity appeared only for small mesocosms (Fig. 2). Large mesocosms had a  
288 significant negative correlation between geographic distance and community dissimilarity but  
289 this was considered an artefact of the linear modelling framework (31) and negligible compared  
290 with the relationship between space and community dissimilarity via the environmental variation  
291 pathway.

292         The path analysis for medium and large mesocosms also suggested an effect of taxa  
293 nestedness whereby communities form as subsets of original communities over time or space  
294 (Tables S4-S6). First, differences in community richness ( $\Delta S$ ) positively correlated with  
295 community dissimilarity. This relationship was strongest in large mesocosms. Second, a

296 significant positive relationship occurred between differences in community size ( $\Delta J$ ) and  
297 richness in medium and large mesocosms.

### 298 *Association networks*

299 Association networks of the 50 most abundant ASVs (members of Actinobacteriota,  
300 Bacteroidota, Cyanobacteria, Planctomycetota and Proteobacteria) differed among the three  
301 mesocosm sizes (Fig. 3, Table S7). The number of total edges and ASV nodes increased with  
302 mesocosm size, and the proportion of delayed (time-shifted) associations were higher in larger  
303 mesocosms (small: 25.9 %, medium: 49.8 %, large: 46 %) (Table S7). Small mesocosms had the  
304 most ASVs ( $n = 18$ ) that were unassociated with environmental variables and bacterial  
305 abundance while medium and large mesocosms had only 4 and 6 ASVs, respectively (Table S7).  
306 Network subsets showed no connection between conductivity and ASVs of small mesocosms,  
307 while conductivity influenced many abundant ASVs from medium and large mesocosms (mainly  
308 phylum Proteobacteria). In large mesocosms, conductivity had a direct (non-delayed) influence  
309 on ASVs (except one Cyanobacterium), while in medium mesocosms it had both time-shifted  
310 (e.g., mainly positive in Bacteroidota and negative in Proteobacteria) and non-delayed (e.g.,  
311 Cyanobacteria) associations with taxa (Fig. S8, Table S8).

312 Association networks were quantitatively compared by mesocosm size with commonly  
313 used topological characteristics. Negative associations, average number of neighbors, and  
314 network density (the proportion of possible edges that are associated with nodes) increased with  
315 mesocosm size (Table S7). Further, small and medium mesocosms networks were less  
316 centralized (the concentration of centrality among the nodes) than those in large mesocosms.  
317 When considering only taxa associations, small mesocosms had the least centralized network  
318 with more taxa displaying similar numbers of links (Table S7).

319

## 320 **Discussion**

321       Here we show how differences in environmental fluctuation strengths due to differences  
322 in ecosystem, i.e. mesocosm, size influenced the temporal dynamics of community assembly in  
323 response to a salinity press disturbance (Fig. 4). First, species sorting was generally the most  
324 influential process for all mesocosms but differences in how species sorting operated among  
325 mesocosm sizes at the community (path analysis) and individual taxa levels (association network  
326 analysis). These evaluations indicated that under low environmental fluctuations, dominant ASV  
327 populations were effective trackers of environmental conditions. When ecosystem size-induced  
328 environmental fluctuations were strong (i.e., small mesocosms), environmental tracking was  
329 disrupted. Second, the salinity press disturbance initiated environmental tracking, especially  
330 under stable conditions (i.e., larger mesocosms), through the recruitment of taxa from seed banks  
331 (mainly sediment at high salinity). Third, stochasticity and dispersal-related assembly processes  
332 (e.g., dispersal limitation) generally were more important for communities of small ecosystems.  
333 Overall, our study aligns with previous findings that ecosystem size influences community  
334 assembly processes (35-37), but we identified this effect to derive from environmental  
335 fluctuations created by ecosystem size differences and corresponding differences in species  
336 sorting effects.

337

### 338 *Salinity press disturbance enforces environmental tracking*

339       Differences in the magnitude of salinity press disturbances induced clear compositional  
340 shifts within and across mesocosms over time. This was expected as we used salinity to induce  
341 species sorting because it is an environmental factor that causes clear taxonomic differences in

342 aquatic bacterial communities (13, 38-41). However, there were disparities in how well  
343 communities in each mesocosm size tracked temporal changes in salinity.

344         The path analysis and network analysis results indicated that species sorting patterns  
345 differed across mesocosm sizes and were altered by time. The direct effects of significant  
346 environmental variables with unidirectional influences (i.e., salinity and temperature) on species  
347 sorting were most influential in medium and large, stabler mesocosms. However, when variables  
348 prone to feedbacks (i.e., nutrients, see below) were included into the total environmental effect  
349 on composition, species sorting was greatest in small, highly fluctuating mesocosms. In contrast,  
350 the indirect effect of time on composition via species sorting increased with mesocosm size and  
351 was driven primarily by changes in all environmental variables except for salinity (which  
352 changed minimally within a mesocosm compared to the salinity gradient). This temporal pattern  
353 generally agreed with the network results of the 50 most abundant bacteria which showed that  
354 they best tracked multiple environmental variables over time in large and medium mesocosms.  
355 Here, almost all ASVs directly linked to environmental variables and populations of core groups  
356 of taxa oscillated correspondingly with temporal salinity changes. In addition, when we isolated  
357 taxa and salinity associations, the network approach revealed many non-delayed associations in  
358 large mesocosms, indicating that the most abundant bacterial populations rapidly  
359 (simultaneously) tracked changes. Despite the path analysis results, no associations were found  
360 in the small mesocosms which could otherwise indicate salinity tracking through time.

361         Several reasons may explain the contradiction between the two analytical approaches  
362 regarding direct species sorting. First, in the network analysis, we calculated associations only  
363 among the 50 most abundant taxa, thus, we likely overlook conditionally rare taxa that can be  
364 temporarily abundant (42) as a consequence of the rapidly changing environment in small

365 mesocosms. This is supported by the trend of higher taxa turnover and direct demographic  
366 stochasticity (discussed below) in small mesocosms. Another explanation may include the  
367 phenomenon that bacterial communities can be an imprint of past environmental conditions (43)  
368 and the correlations detected between community dissimilarity and environmental variables  
369 might coincide with prior processes. Last, the analytical approaches generally agreed concerning  
370 direct effects by salinity, but differed for variables with the potential for feedbacks (i.e.,  
371 nutrients). Although the path analysis portrays nutrients as effect variables, they are also  
372 modified by microorganisms. Likely due to the salinity and greater proportions of sediment,  
373 small mesocosms had greater nutrient concentrations and higher cell densities including from  
374 observed algal blooms. These conditions could increase competition which hinders synchrony  
375 between abiotic variables and taxa abundances (44).

376       Taken together, our findings (conceptualized in Fig. 4) around the importance of species  
377 sorting and the strong temporal influences highlight the distinct differences in the mechanisms  
378 underlying species sorting in mesocosms of different sizes. These findings became apparent  
379 through combining the path analysis, which captures both spatial and temporal patterns at the  
380 whole community level, and the network analysis, which captures time-associated patterns of the  
381 most abundant populations.

382

### 383 *Ecosystem size regulates community assembly and associations among bacterioplankton*

384       While the different environmental conditions from the press disturbance and ongoing  
385 environmental changes throughout the experiment might explain why species sorting was the  
386 main driver of metacommunity assembly, our study suggests that other factors related to

387 ecosystem size (e.g., spatial environmental heterogeneity) could further regulate  
388 metacommunities.

389         The importance of species sorting can increase with environmental heterogeneity, i.e.,  
390 the number of niches that are available for colonization across patches (45, 46). In our study,  
391 large mesocosms contained greater spatial environmental heterogeneity evidenced by depth  
392 associated changes in temperature and light. Hence, across mesocosms spatial environmental  
393 heterogeneity could explain why species sorting was more apparent in large compared to small  
394 mesocosms based on the network analysis. This might also explain the increased associations in  
395 larger mesocosms, enhancing the probabilities for true biotic interactions. This increase may be  
396 attributed to (i) the greater availability of niches (and consistency of nutrients) found in larger  
397 mesocosms, or (ii) the synchronous establishment of bacteria which might have a better chance  
398 in a stable environment. In a study of protists experiencing light-dark fluctuations in aquatic  
399 microcosms and models, high fluctuations disrupted species synchrony between patches (47).  
400 Spatial heterogeneity could also explain the greater bacterial richness as ecosystem size  
401 increased.

402         Network topological features were partially influenced by mesocosm size: bacteria were  
403 more connected in medium or large than small mesocosms, suggesting that abundance dynamics  
404 were less similar across small mesocosms and indicating asynchrony among dominant bacteria.  
405 In these less densely populated, large mesocosms, competition may have lessened which can  
406 lead to greater synchrony between species that is driven by changes in abiotic conditions (44). In  
407 our mesocosms, more connected, centralized communities with greater network density occurred  
408 as size increased, indicating the presence of subnetworks or cliques and that, due to lower  
409 fluctuation strength, the establishment of more connected, denser networks were common under

410 stabler environments (Fig. 4). Because size replicates in the network analysis spanned the  
411 salinity gradient, this further suggests that the spatial environmental heterogeneity of salinity had  
412 less importance for potential biotic associations among stabler mesocosms.

413 Taken together, we suggest that these patterns indicate mesocosm size-specific  
414 mechanisms of species sorting: in small mesocosms, changes in community composition from  
415 species sorting primarily occurred through taxa replacement in response to variation in multiple  
416 environmental factors. In contrast, in larger mesocosms, environmental change was more gradual  
417 and cascaded into compositional differences through abundant bacteria tracking environmental  
418 changes over time by changing in relative population size, with lower replacement (Fig. 4).

419

#### 420 *Recruitment of the members of bacterioplankton*

421 Initial community size due to differences in mesocosm volume might have affected the  
422 resulting community composition through species sorting, but other factors related to the  
423 experimental set-up were unlikely to have substantial influence. The experimental set-up ensured  
424 no extensive differences in the recruitment of novel species from external sources due to  
425 proportional mesocosm surface areas and equal initial sediment volumes. There were also no  
426 differences in estimated richness of active bacteria between mesocosms on the first day of the  
427 experiment. The dispersal sources (rain and air deposition as well as seed banks in sediments and  
428 lake water) all harbored high diversity and in previous studies were shown to be important  
429 recruitment sources for novel taxa following salinity disturbances (15-17) and other types of  
430 environmental change (48). Although large mesocosms contained more total microorganisms  
431 and thereby possibly a larger planktonic seed bank from which taxa could respond to the salinity  
432 disturbance, recruitment from the water seed bank declined with salinity in all mesocosm sizes

433 (Fig. 4). Even with reduced dispersal, future studies that extend temporal sampling beyond the  
434 64 days sampled here may eventually see eco-evolutionary processes such as increased tracking  
435 of environmental conditions in small mesocosms due to bacterial diversification, which can be  
436 intensified by a history of environmental adversity (49). The high percentage of ASVs for which  
437 we did not identify a source (85%) could indicate dispersal from other sources such as the snails  
438 we observed on most mesocosms. or the effect of sequencing depth which can miss the rarest  
439 taxa.

440

#### 441 *Roles of stochasticity and dispersal-related processes*

442         Demographic stochasticity (leading to ecological drift) was an important driver of  
443 community assembly of all mesocosms via community size with the strongest direct effect in  
444 small mesocosms (Fig. 4). This result is bolstered by previous studies showing that ecological  
445 drift more often occurs in small communities (50, 51) especially when the importance of species  
446 sorting is weak (52) or when the effective community size is small due to dispersal limitation  
447 (53). This may be why we did not detect synchronous environmental tracking from the dominant  
448 populations across the small mesocosms. Drift can also alter the outcome of niche selection (54).  
449 Nevertheless, the effect of time on community composition indicated that large mesocosm  
450 communities were most influenced by demographic stochasticity arising from temporal  
451 influences. In this case, large mesocosms may more strongly reflect (i) random changes in births  
452 and deaths from a community that grew in number over time, (ii) stochasticity based on priority  
453 effects from slower time-delayed tracking, or (iii) may reflect sampling timepoints that  
454 underrepresented the larger total community.



455           Dispersal limitation as driver of metacommunity dynamics (considering all mesocosms at  
456 one time point) was present only in small sized mesocosms and suggests that multiple  
457 communities emerged from similar initial conditions in the small mesocosms. However, the  
458 interpretation of the dispersal limitation is ambiguous (e.g.(55)). It could be true dispersal  
459 limitation whereby niche spaces that are opened (i.e., when species become inactive in response  
460 to the initial salinity changes which increase habitat specialists (56) and/or the strong  
461 environmental changes) remain empty (57). However, it does not necessarily indicate true  
462 dispersal limitation between patches (55) or reduced immigration from a regional pool. Instead,  
463 it can be explained by the low richness of these mesocosm communities decreasing the  
464 likelihood that they contain superb dispersers. When dispersal rates are low, local adaptations to  
465 environmental fluctuations can lead to strengthened priority effects by preemptive taxa (58),  
466 which might have occurred during the experiment. For example, the many time-delayed  
467 associations between salinity and bacterial taxa in medium mesocosms could be a sign of  
468 transient priority effects where taxa (i.e., Bacteroidota and Proteobacteria but not Cyanobacteria)  
469 maintained abundances for a short period without environmental tracking. Nevertheless, with our  
470 data and the applied approaches, it is not possible to clearly support or exclude assembly  
471 processes and other factors that regulate them.

472

### 473 *Conclusions*

474           Overall, our results partially align with those from previous studies which show that after  
475 disturbances, stochastic community assembly initially is important, but the dominant influence  
476 shifts to deterministic processes in later successional stages (e.g. (59)), especially when  
477 environmental conditions are stable. Dispersal limitation and ecological drift (demographic

478 stochasticity) were drivers of metacommunity dynamics after community establishment with  
479 strong environmental fluctuations. Mesocosms with reduced environmental fluctuations may  
480 facilitate considerable time-delayed species sorting and thus possibly, a transient influence of  
481 priority effects. The novelty of our study is that we could show, by applying both path and  
482 network approaches, that the trajectories of (meta)community development are influenced by  
483 size-induced environmental fluctuations in concert with a salinity press disturbance. Our results  
484 represent the advantage of joining a network analysis together with metacommunity models, and  
485 stress that environmental fluctuations are important to consider in future community assembly  
486 studies as they can modify community assembly under natural conditions.

487

#### 488 **Acknowledgements**

489 This work was mainly supported by the Carl Tryggers Foundation. Sequencing was performed  
490 by the SNP&SEQ Technology Platform in Uppsala. The facility is part of the National Genomics  
491 Infrastructure (NGI) Sweden and Science for Life Laboratory. The SNP&SEQ Platform is also  
492 supported by the Swedish Research Council and the Knut and Alice Wallenberg Foundation.  
493 Computations were enabled by resources provided by the Swedish National Infrastructure for  
494 Computing (SNIC) at the Uppsala Multidisciplinary Center for Advanced Computational  
495 Science (UPPMAX) partially funded by the Swedish Research Council through grant agreement  
496 no. 2018-05973. This field mesocosm experiment has been made possible by the Swedish  
497 Infrastructure for Ecosystem Science (SITES), in this case the Erken Laboratory. SITES receives  
498 funding through the Swedish Research Council under the grant no. 2017-00635. This study was  
499 supported in part by resources and technical expertise from the Georgia Advanced Computing  
500 Resource Center, a partnership between the University of Georgia's Office of the Vice President

501 for Research and Office of the Vice President for Information Technology. The authors thank  
502 Christoffer Bergvall and Robin Hagblom for laboratory guidance and assistance, and Karsten  
503 Meier for help with fieldwork and data management.

504

505 **Data accessibility statement:** The data supporting the results are archived in the public  
506 repository European Nucleotide Archive with accession number PRJEB26595 and  
507 environmental data are made available in the Swedish institutional repository, DiVA, (diva-  
508 portal.org) with the following accession number: diva2:1210995.

509

#### 510 **Competing Interests**

511 The authors declare no competing interests.

512

#### 513 **References**

- 514 1. Vellend M. Conceptual synthesis in community ecology. *The Quarterly Review of*  
515 *Biology*. 2010;85(2):183-206.
- 516 2. Leibold MA, Chase JM. *Metacommunity Ecology*. Princeton, NJ.: Princeton University  
517 Press,; 2017.
- 518 3. Logue JB, Mouquet N, Peter H, Hillebrand H, Metacommunity Working G. Empirical  
519 approaches to metacommunities: a review and comparison with theory. *Trends Ecol Evol*.  
520 2011;26(9):482-91.
- 521 4. Hanson CA, Fuhrman JA, Horner-Devine MC, Martiny JB. Beyond biogeographic  
522 patterns: processes shaping the microbial landscape. *Nat Rev Microbiol*. 2012;10(7):497-506.

- 523 5. Lindström ES, Langenheder S. Local and regional factors influencing bacterial  
524 community assembly. *Environ Microbiol Rep.* 2012;4(1):1-9.
- 525 6. Langenheder S, Lindström ES. Factors influencing aquatic and terrestrial bacterial  
526 community assembly. *Environ Microbiol Rep.* 2019;11(3):306-15.
- 527 7. Leibold MA, Holyoak M, Mouquet N, Amarasekare P, Chase JM, Hoopes MF, et al. The  
528 metacommunity concept: a framework for multi-scale community ecology. *Ecology Letters.*  
529 2004;7(7):601-13.
- 530 8. Vass M, Langenheder S. The legacy of the past: effects of historical processes on  
531 microbial metacommunities. *Aquatic Microbial Ecology.* 2017;79(1):13-9.
- 532 9. Fukami T. Historical contingency in community assembly: integrating niches, species  
533 pools, and priority effects. *Annual Review of Ecology, Evolution, and Systematics.*  
534 2015;46(1):1-23.
- 535 10. Herlemann DP, Labrenz M, Jurgens K, Bertilsson S, Waniek JJ, Andersson AF.  
536 Transitions in bacterial communities along the 2000 km salinity gradient of the Baltic Sea. *ISME*  
537 *J.* 2011;5(10):1571-9.
- 538 11. Neubauer SC, Piehler MF, Smyth AR, Franklin RB. Saltwater Intrusion Modifies  
539 Microbial Community Structure and Decreases Denitrification in Tidal Freshwater Marshes.  
540 *Ecosystems.* 2018;22(4):912-28.
- 541 12. Rath KM, Fierer N, Murphy DV, Rousk J. Linking bacterial community composition to  
542 soil salinity along environmental gradients. *ISME J.* 2019;13(3):836-46.
- 543 13. Tang X, Xie G, Shao K, Tian W, Gao G, Qin B. Aquatic Bacterial Diversity, Community  
544 Composition and Assembly in the Semi-Arid Inner Mongolia Plateau: Combined Effects of  
545 Salinity and Nutrient Levels. *Microorganisms.* 2021;9(2).

- 546 14. Xia LC, Steele JA, Cram JA, Cardon ZG, Simmons SL, Vallino JJ, et al. Extended local  
547 similarity analysis (eLSA) of microbial community and other time series data with replicates.  
548 *BMC Systems Biology*. 2011;5:S15.
- 549 15. Langenheder S, Comte J, Zha Y, Samad MS, Sinclair L, Eiler A, et al. Remnants of  
550 marine bacterial communities can be retrieved from deep sediments in lakes of marine origin.  
551 *Environ Microbiol Rep*. 2016;8(4):479-85.
- 552 16. Comte J, Lindstrom ES, Eiler A, Langenheder S. Can marine bacteria be recruited from  
553 freshwater sources and the air? *ISME J*. 2014;8(12):2423-30.
- 554 17. Comte J, Langenheder S, Berga M, Lindstrom ES. Contribution of different dispersal  
555 sources to the metabolic response of lake bacterioplankton following a salinity change. *Environ*  
556 *Microbiol*. 2017;19(1):251-60.
- 557 18. Langenheder S, Ragnarsson H. The role of environmental and spatial factors for the  
558 composition of aquatic bacterial communities. *Ecology*. 2007;88(9):2154-61.
- 559 19. del Giorgio PA, Bird DF, Prairie YT, Planas D. Flow cytometric determination of  
560 bacterial abundance in lakeplankton with the green nucleid acid stain SYTO 13. *Limnology and*  
561 *Oceanography*. 1996;41:783-9.
- 562 20. Blazewicz SJ, Barnard RL, Daly RA, Firestone MK. Evaluating rRNA as an indicator of  
563 microbial activity in environmental communities: limitations and uses. *ISME J*.  
564 2013;7(11):2061-8.
- 565 21. Martin M. Cutadapt removes adapter sequences from high- throughput sequencing reads.  
566 *EMBnet Journal*. 2011;17:10-2.
- 567 22. Callahan BJ, McMurdie PJ, Rosen MJ, Han AW, Johnson AJ, Holmes SP. DADA2:  
568 High-resolution sample inference from Illumina amplicon data. *Nat Methods*. 2016;13(7):581-3.

- 569 23. Quast C, Pruesse E, Yilmaz P, Gerken J, Schweer T, Yarza P, et al. The SILVA  
570 ribosomal RNA gene database project: improved data processing and web-based tools. *Nucleic  
571 Acids Res.* 2013;41(Database issue):D590-6.
- 572 24. R-Core-Team. R: A language and environment for statistical computing. Vienna, Austria:  
573 R Foundation for Statistical Computing; 2020.
- 574 25. Oksanen J, Blanchet FG, Friendly M, Kindt R, Legendre P, McGlinn D, et al. *vegan*:  
575 Community Ecology Package. R package version 2.5-7. ed2020.
- 576 26. Bier RL. Field and chemistry data from 2016 Fluctuations Project Data sets. In: DiVA,  
577 editor. <http://urn.kb.se/resolve?urn=urn:nbn:se:uu:diva-3517382016>.
- 578 27. Noguchi K, Gel YR, Brunner E, Konietschke F. nparLD: An R software package for the  
579 nonparametric analysis of longitudinal data in factorial experiments. *Journal of Statistical  
580 Software.* 2012;50:1-23.
- 581 28. Willis A, Martin BD, Trinh P, Teichman S, Barger K, Bunge J. *breakaway*: Species  
582 Richness Estimation and Modeling. R package version 4.7.3. ed2020.
- 583 29. Baselga A, Orme D, Villeger S, De Bortoli J, Leprieur F, Logez M. *betapart*: Partitioning  
584 beta diversity into turnover and nestedness components. R package version 1.5.2 ed2020.
- 585 30. Anderson MJ. *Permutational Multivariate Analysis of Variance (PERMANOVA)*. Wiley  
586 *StatsRef: Statistics Reference Online*2017. p. 1-15.
- 587 31. Jabot F, Laroche F, Massol F, Arthaud F, Crabot J, Dubart M, et al. Assessing  
588 metacommunity processes through signatures in spatiotemporal turnover of community  
589 composition. *Ecol Lett.* 2020;23(9):1330-9.
- 590 32. Rosseel Y. *lavaan*: An R Package for Structural Equation Modeling. *Journal of Statistical  
591 Software.* 2012;48:1-36.

- 592 33. Shannon P, Markiel A, Ozier O, Baliga NS, Wang JT, Ramage D, et al. Cytoscape: a  
593 software environment for integrated models of biomolecular interaction networks. *Genome Res.*  
594 2003;13(11):2498-504.
- 595 34. Assenov Y, Ramirez F, Schelhorn SE, Lengauer T, Albrecht M. Computing topological  
596 parameters of biological networks. *Bioinformatics.* 2008;24(2):282-4.
- 597 35. Drake JA. Community-Assembly Mechanics and the Structure of an Experimental  
598 Species Ensemble. *The American Naturalist.* 1991;137(1):1-26.
- 599 36. Orrock JL, Fletcher Jr. RL. Changes in Community Size Affect the Outcome of  
600 Competition. *The American Naturalist.* 2005;166(1):107-11.
- 601 37. Fukami T. Community assembly along a species pool gradient: implications for  
602 multiple- scale patterns of species diversity. *Population Ecology.* 2004;46(2):137-47.
- 603 38. Lozupone CA, Hamady M, Kelley ST, Knight R. Quantitative and qualitative beta  
604 diversity measures lead to different insights into factors that structure microbial communities.  
605 *Appl Environ Microbiol.* 2007;73(5):1576-85.
- 606 39. Werba JA, Stucy AL, Peralta AL, McCoy MW. Effects of diversity and coalescence of  
607 species assemblages on ecosystem function at the margins of an environmental shift. *PeerJ.*  
608 2020;8:e8608.
- 609 40. Logares R, Brate J, Bertilsson S, Clasen JL, Shalchian-Tabrizi K, Rengefors K.  
610 Infrequent marine-freshwater transitions in the microbial world. *Trends Microbiol.*  
611 2009;17(9):414-22.
- 612 41. Logares R, Lindstrom ES, Langenheder S, Logue JB, Paterson H, Laybourn-Parry J, et al.  
613 Biogeography of bacterial communities exposed to progressive long-term environmental change.  
614 *ISME J.* 2013;7(5):937-48.

- 615 42. Shade A, Jones SE, Caporaso JG, Handelsman J, Knight R, Fierer N, et al. Conditionally  
616 rare taxa disproportionately contribute to temporal changes in microbial diversity. *mBio*.  
617 2014;5(4):e01371-14.
- 618 43. Andersson MGI, Berga M, Lindström ES, Langenheder S. The spatial structure of  
619 bacterial communities is influenced by historical environmental conditions. *Ecology*.  
620 2014;95(5):1134-40.
- 621 44. Lee AM, Sæther B-E, Engen S. Spatial covariation of competing species in a fluctuating  
622 environment. *Ecology*. 2020;101(1):e02901.
- 623 45. Ai D, Gravel D, Chu C, Wang G. Spatial structures of the environment and of dispersal  
624 impact species distribution in competitive metacommunities. *PLoS One*. 2013;8(7):e68927.
- 625 46. Maloufi S, Catherine A, Mouillot D, Louvard C, Couté A, Bernard C, et al.  
626 Environmental heterogeneity among lakes promotes hyper  $\beta$ -diversity across phytoplankton  
627 communities. *Freshwater Biology*. 2016;61(5):633-45.
- 628 47. Firkowski CR, Thompson PL, Gonzalez A, Cadotte MW, Fortin M-J. Multi-trophic  
629 metacommunity interactions mediate asynchrony and stability in fluctuating environments.  
630 *Ecological Monographs*.n/a(n/a):e1484.
- 631 48. Lennon JT, Jones SE. Microbial seed banks: the ecological and evolutionary implications  
632 of dormancy. *Nat Rev Microbiol*. 2011;9(2):119-30.
- 633 49. Knope ML, Forde SE, Fukami T. Evolutionary history, immigration history, and the  
634 extent of diversification in community assembly. *Front Microbiol*. 2011;2:273.
- 635 50. Fukami T. Assembly history interacts with ecosystem size to influence species diversity.  
636 *Ecology*. 2004;85(12):3234-42.



- 637 51. Orrock JL, Watling JI. Local community size mediates ecological drift and competition  
638 in metacommunities. *Proc Biol Sci*. 2010;277(1691):2185-91.
- 639 52. Chase JM. Community assembly: when should history matter? *Oecologia*.  
640 2003;136(4):489-98.
- 641 53. Ron R, Fragman-Sapir O, Kadmon R. Dispersal increases ecological selection by  
642 increasing effective community size. *Proc Natl Acad Sci U S A*. 2018;115(44):11280-5.
- 643 54. Siqueira T, Saito VS, Bini LM, Melo AS, Petsch DK, Landeiro VL, et al. Community  
644 size can affect the signals of ecological drift and niche selection on biodiversity. *Ecology*.  
645 2020;101(6):e03014.
- 646 55. Vass M, Szekely AJ, Lindstrom ES, Langenheder S. Using null models to compare  
647 bacterial and microeukaryotic metacommunity assembly under shifting environmental  
648 conditions. *Sci Rep*. 2020;10(1):2455.
- 649 56. Shen D, Langenheder S, Jurgens K. Dispersal Modifies the Diversity and Composition of  
650 Active Bacterial Communities in Response to a Salinity Disturbance. *Front Microbiol*.  
651 2018;9:2188.
- 652 57. Cunze S, Heydel F, Tackenberg O. Are plant species able to keep pace with the rapidly  
653 changing climate? *PLoS One*. 2013;8(7):e67909.
- 654 58. Loeuille N, Leibold MA. Evolution in metacommunities: on the relative importance of  
655 species sorting and monopolization in structuring communities. *Am Nat*. 2008;171(6):788-99.
- 656 59. Dini-Andreote F, Stegen JC, van Elsas JD, Salles JF. Disentangling mechanisms that  
657 mediate the balance between stochastic and deterministic processes in microbial succession. *Proc*  
658 *Natl Acad Sci U S A*. 2015;112(11):E1326-32.

659

660 **Figure Legends**

661 **Figure 1.** Temporal patterns of alpha diversity metrics for bacterial communities in dispersal  
662 sources (air and rain), source media (sediment and water) (DNA) and mesocosm water (RNA).  
663 Error bars are standard error. Diversity metrics for large mesocosms greater than both small and  
664 medium mesocosms (repeated measures ANOVA, pairwise t-test with Bonferroni correction,  $p <$   
665 0.05). Source media  $n = 3$ , mesocosm sizes  $n = 16$ , air and rain  $n = 1$ . Note difference in y-axis  
666 scales.

667  
668 **Figure 2.** Path analysis diagrams of small, medium, and large mesocosm sizes. The influence of  
669 spatial distances ( $\Delta x$ ), temporal distances ( $\Delta t$ ), environmental distances ( $\Delta E$ ), mean community  
670 size ( $\langle J \rangle$ ), absolute difference in community size ( $\Delta J$ ) and species richness ( $\Delta S$ ) on community  
671 dissimilarity ( $\beta_{bc}$ ) was quantified following Jabot et al.'s framework (2020). Arrow width  
672 represents standardized estimate strength with positive estimate arrows in solid lines and  
673 negative estimates in dashed lines. For environmental variables, the absolute values of  
674 standardized estimates were added. Effects shown have  $p < 0.05$ . SRMR = Standardized Root  
675 Mean Square Residual. See Tables S4-S6 for standardized estimate values.

676  
677 **Figure 3.** Association networks and the relative abundances of the 50 most abundant bacteria of  
678 the three mesocosm size categories ( $n = 16$ ). All significant ( $(p \leq 0.01$  and  $Q \leq 0.01)$ ) pairwise  
679 local similarity (LS) correlations  $\geq 0.05$  are shown as edges in the networks. Each node  
680 represents an ASV (ellipse) or an environmental factor (rectangle). Edge transparency is  
681 proportional to the association strength (based on LS values). Solid lines refer to positive  
682 associations while dashed lines to negative ones. Edge colors indicate delayed (blue) and non-

683 delayed (black) associations between ASVs and/or environmental variables. Arrows point  
684 toward the lagging node.

685

686 **Figure 4.** Conceptual figure for the interpretation of statistical results and patterns based on path  
687 analysis, network analysis, and the partitioning of beta-diversity. In our study, the dominant  
688 deterministic force was the applied salinity press disturbance. Ecosystem size was manipulated  
689 by different volumes of mesocosms. Darker shading in bars indicates greater influence of the  
690 process.

Diversity Value (mean)

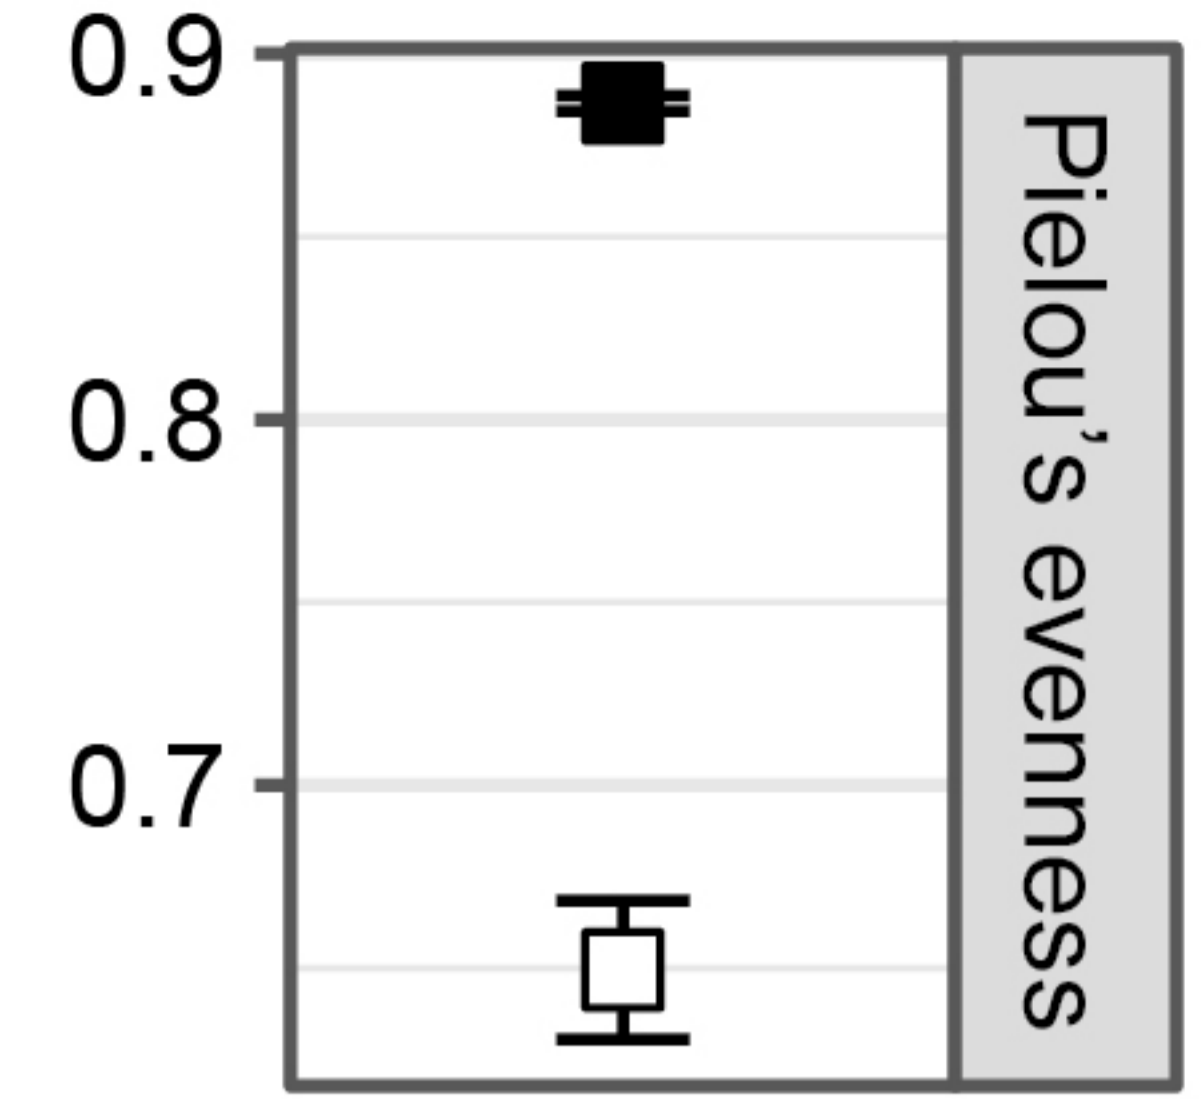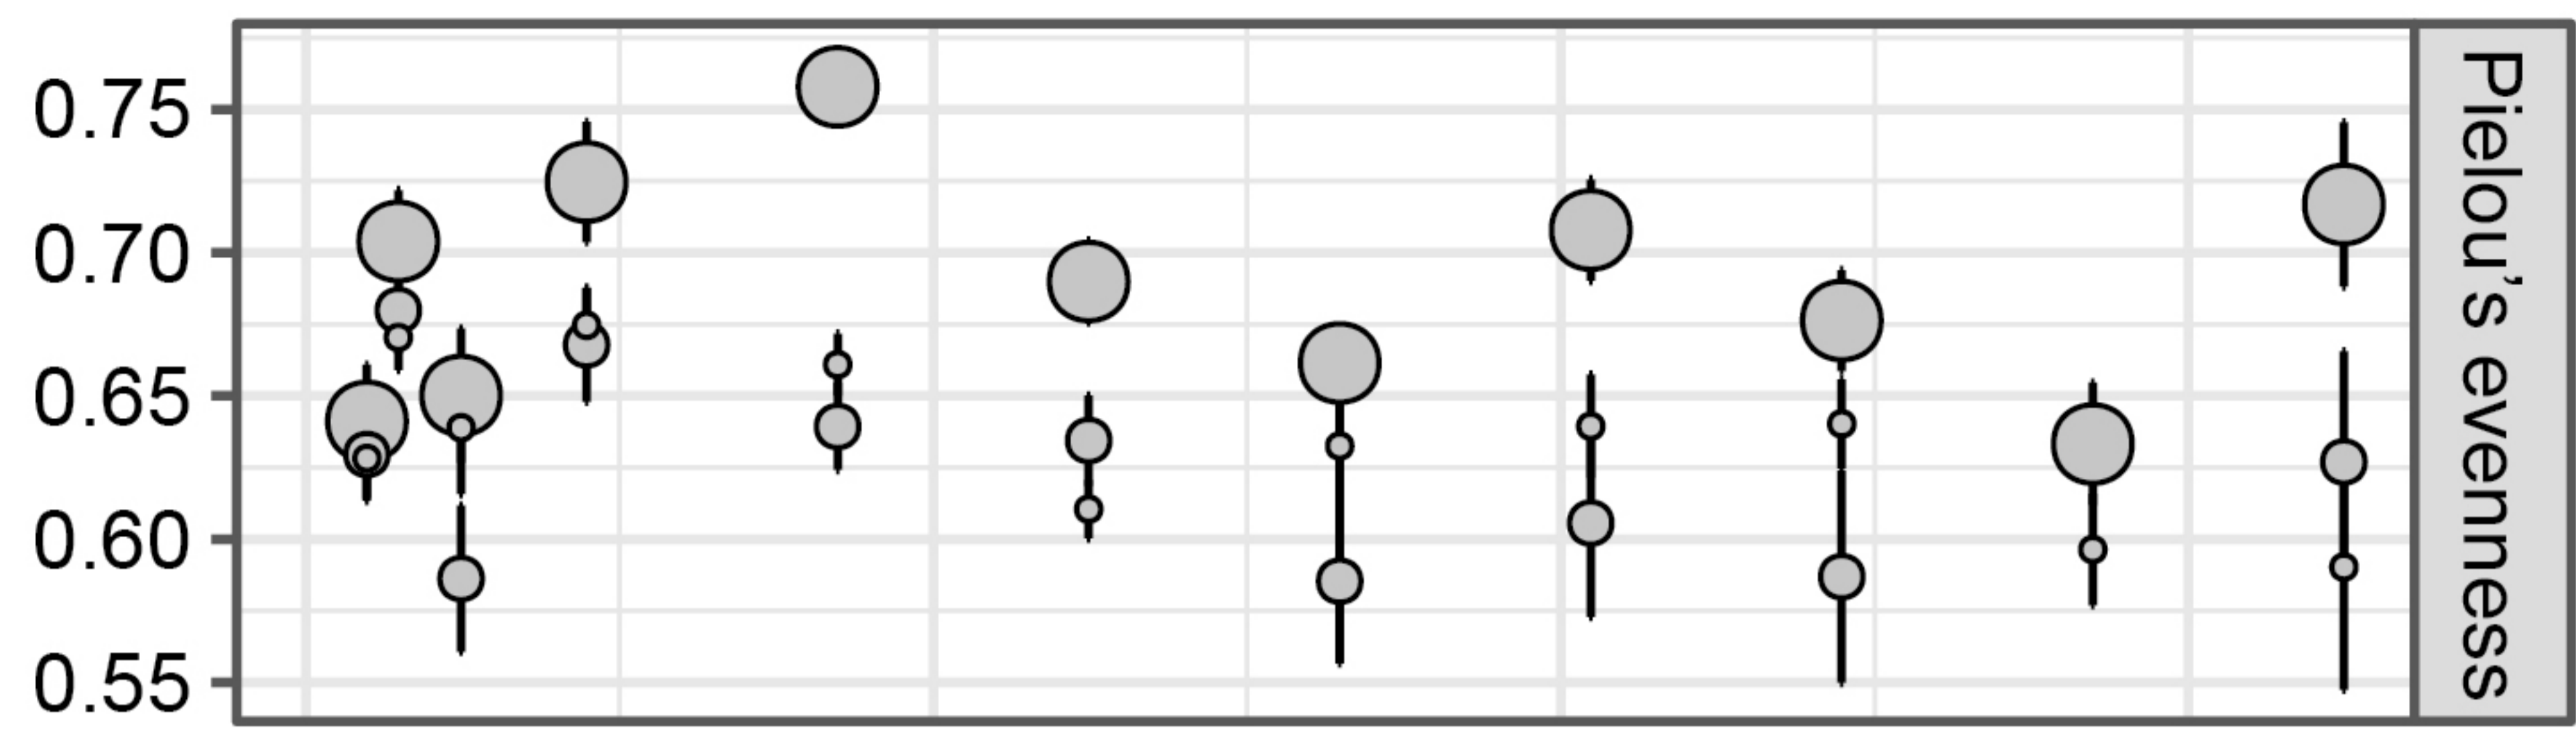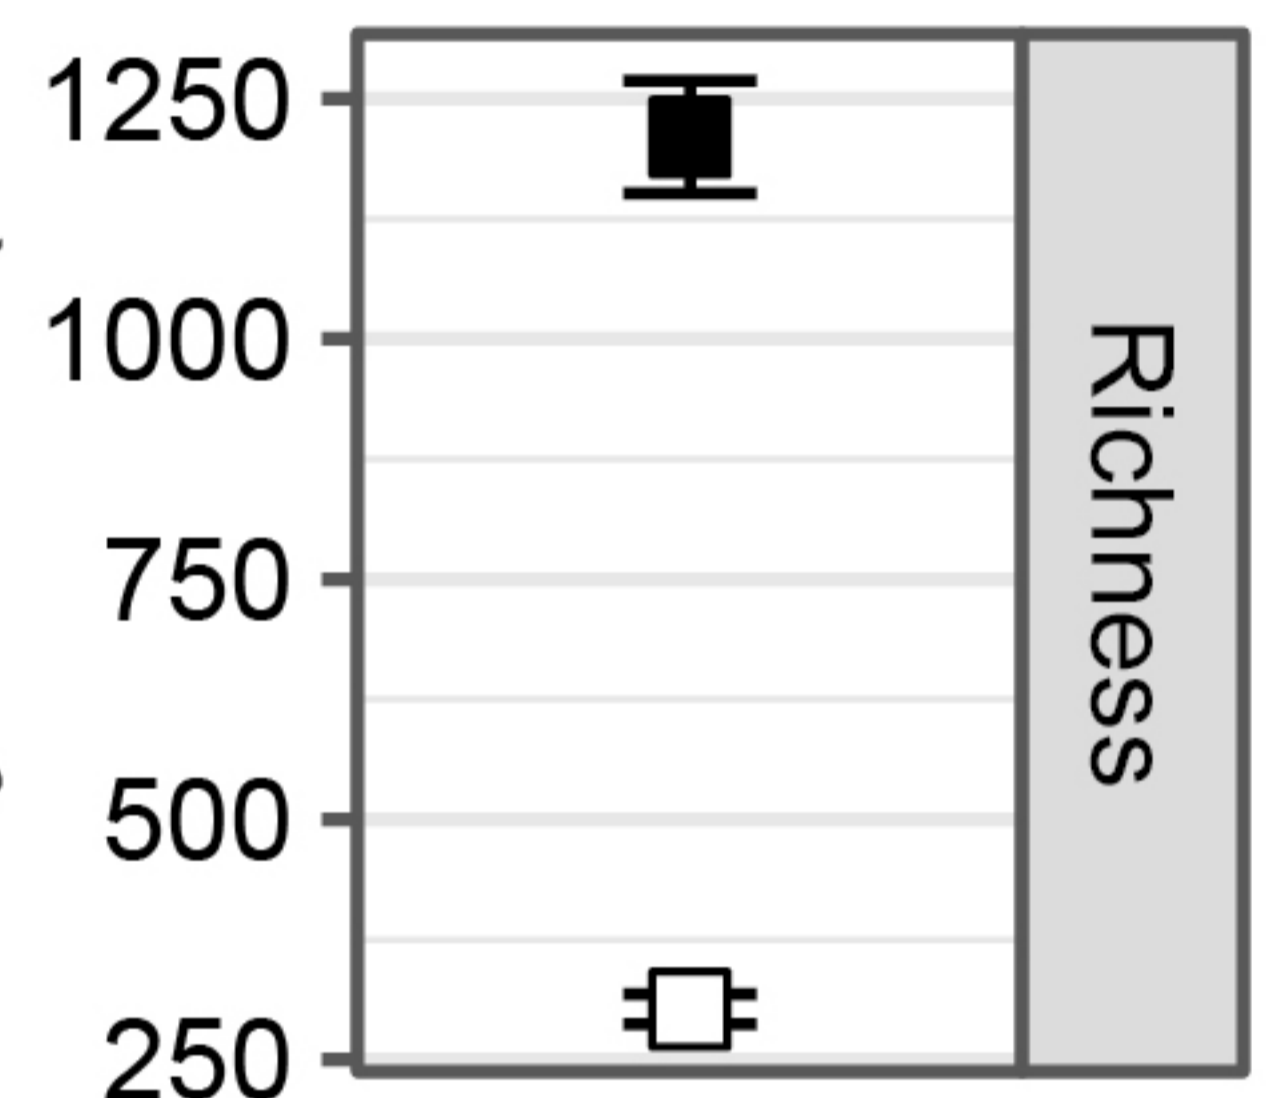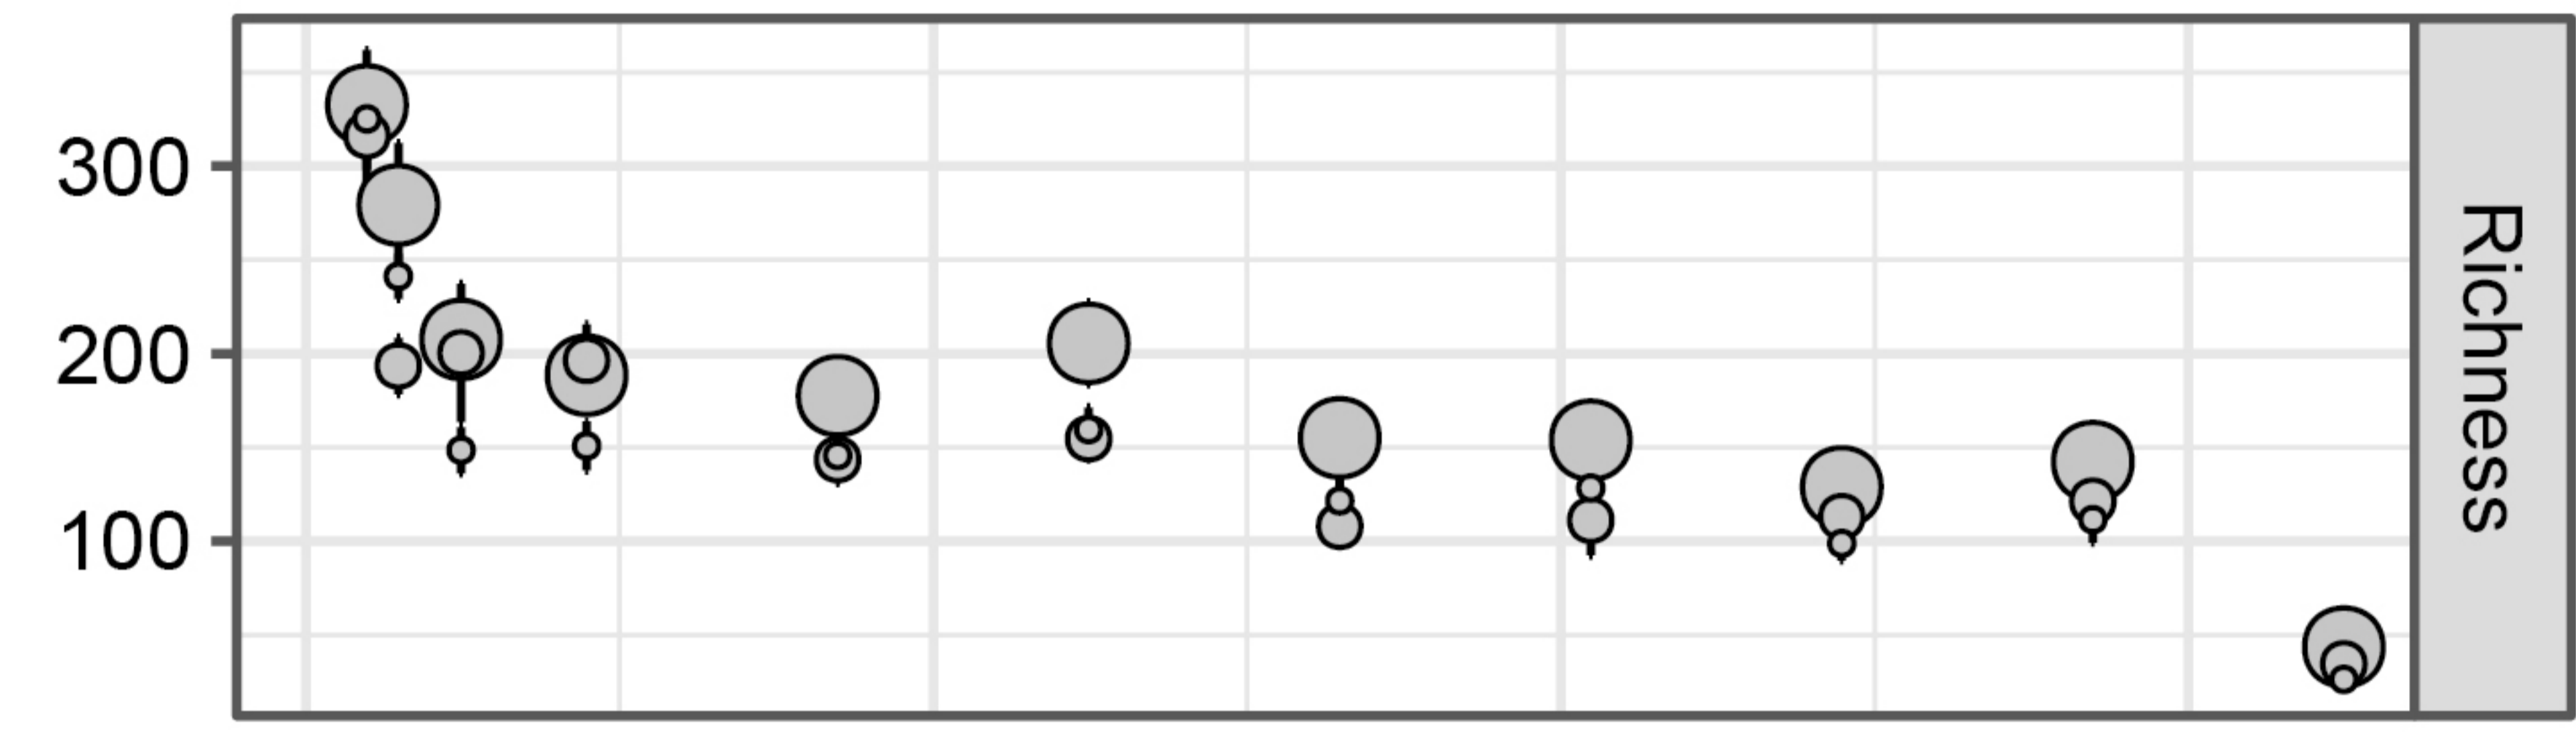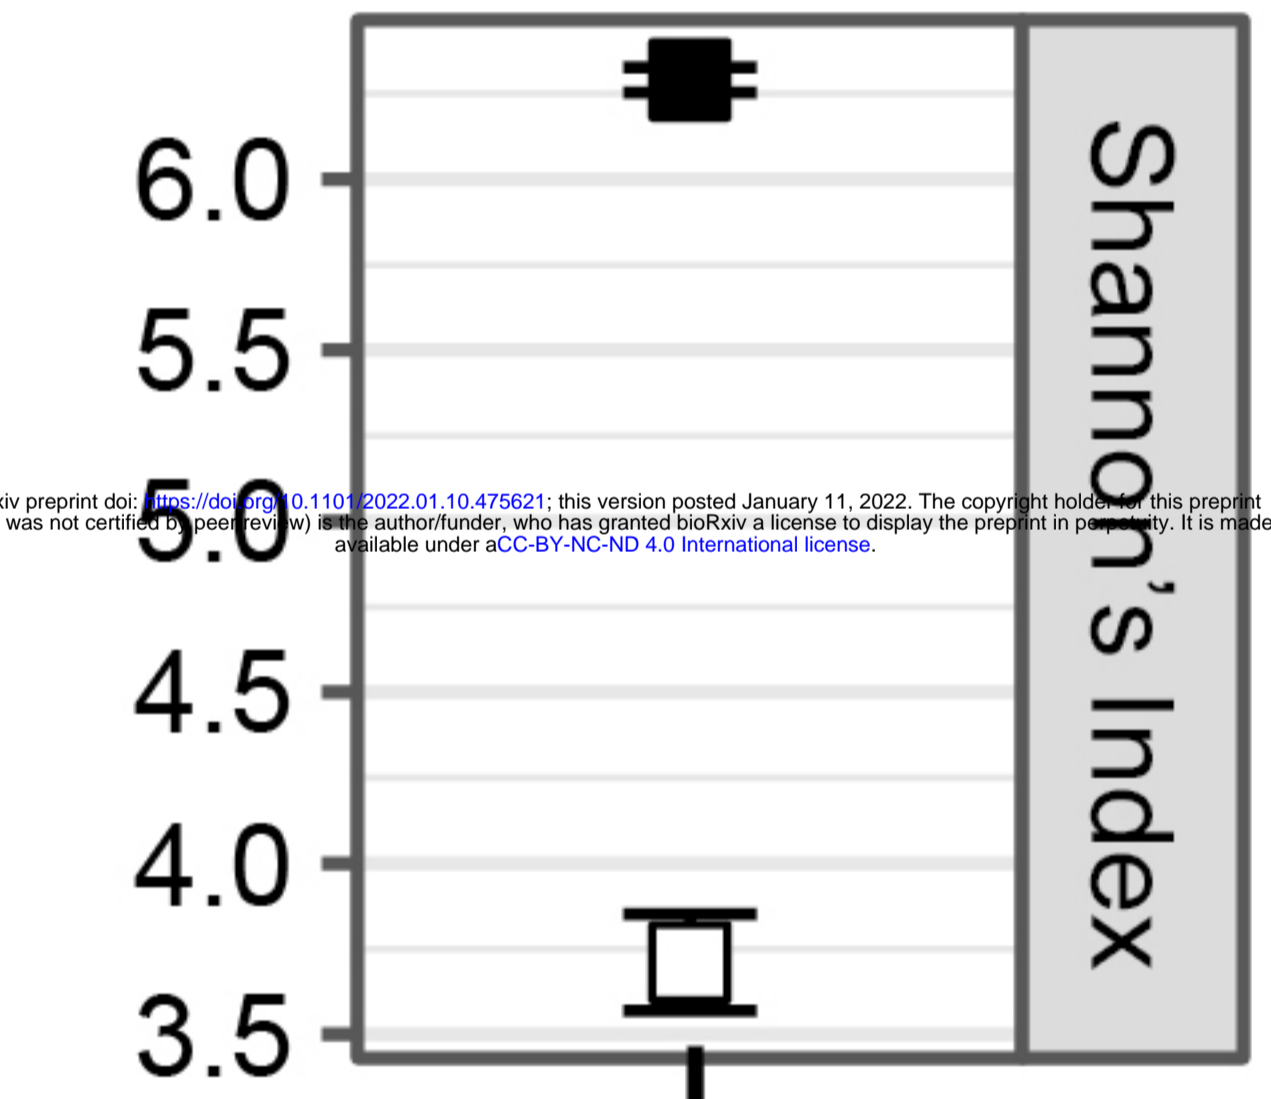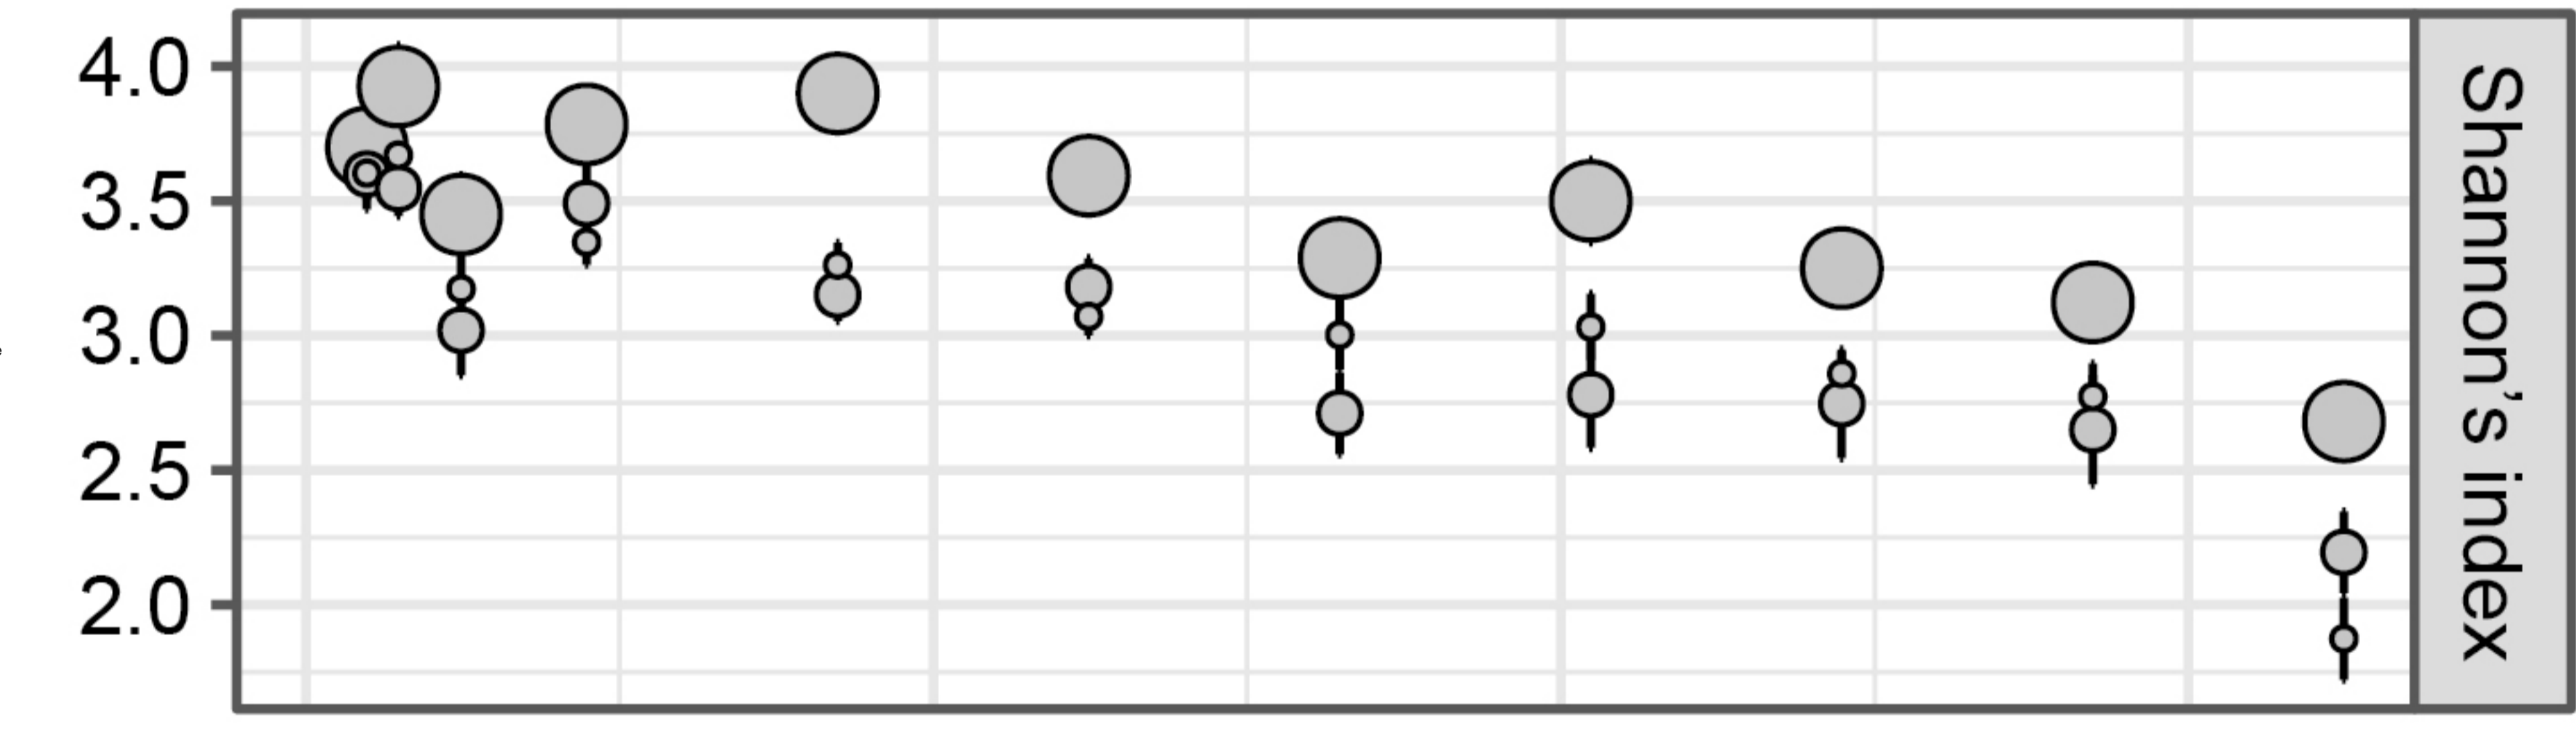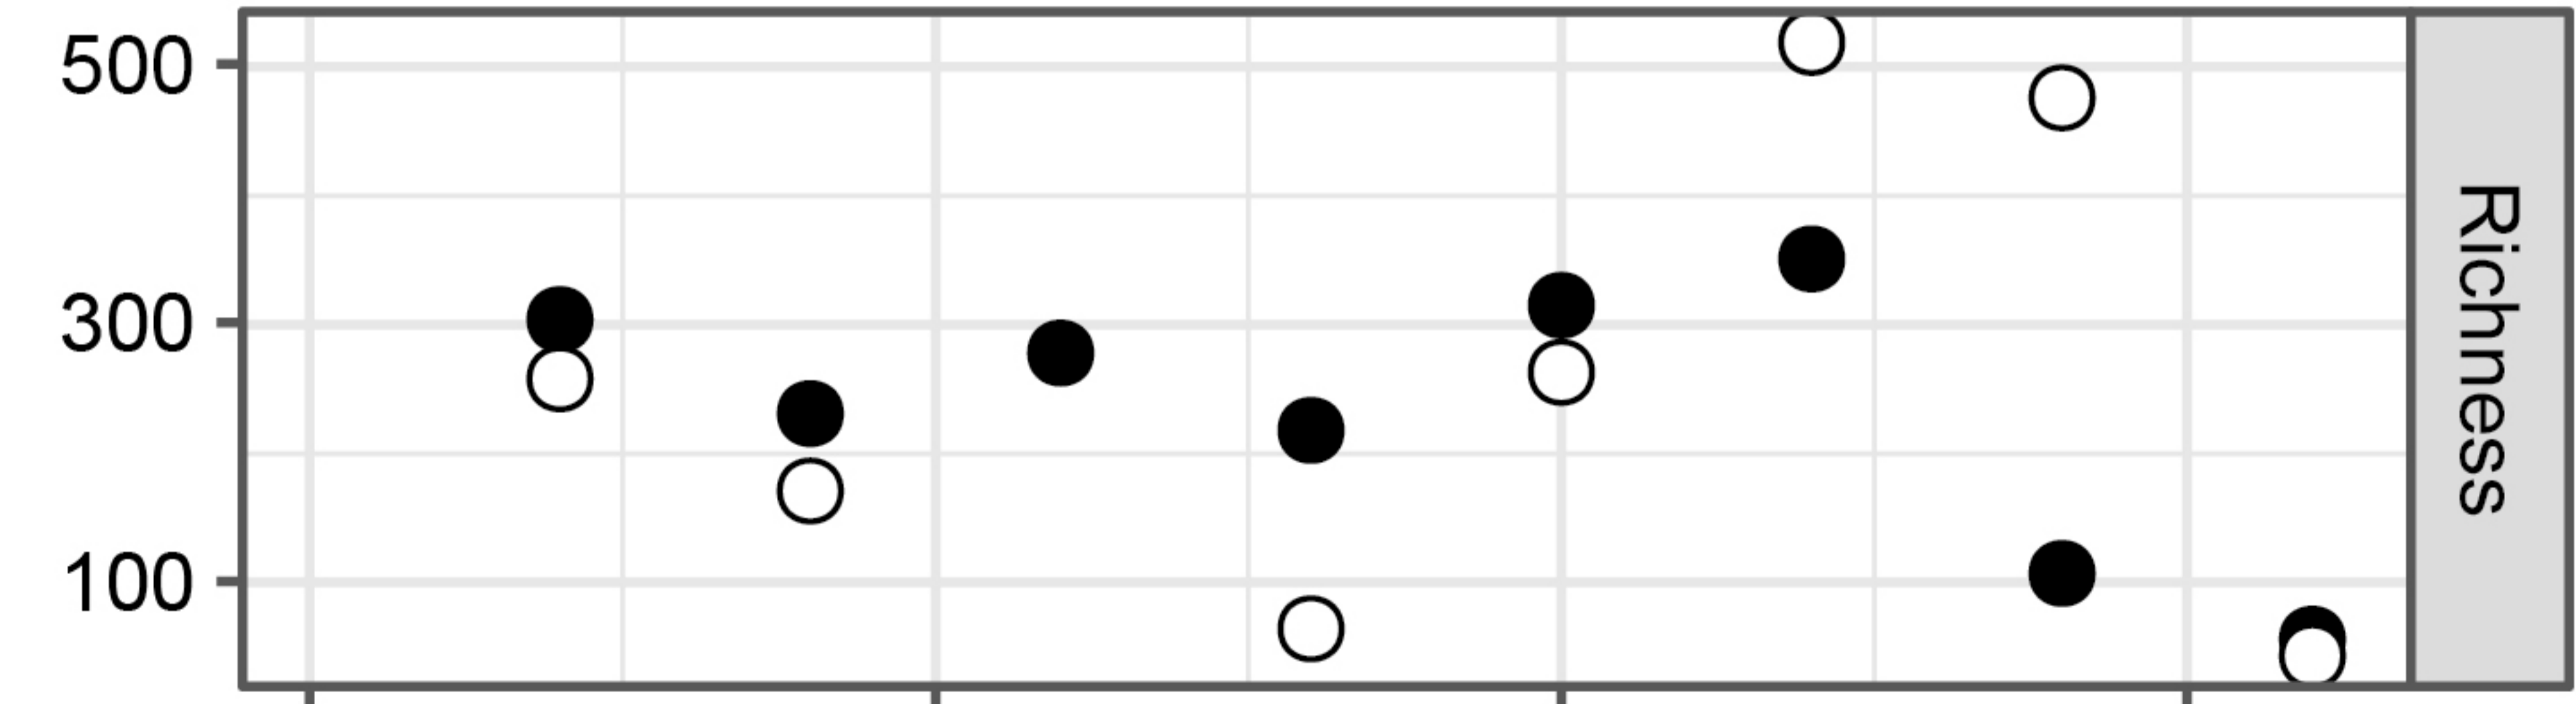

Mesocosm Size

- Large
- Medium
- Small

Dispersal Source

- Air
- Rain

bioRxiv preprint doi: <https://doi.org/10.1101/2022.01.10.475621>; this version posted January 11, 2022. The copyright holder for this preprint (which was not certified by peer review) is the author/funder, who has granted bioRxiv a license to display the preprint in perpetuity. It is made available under aCC-BY-NC-ND 4.0 International license.

Time (days)

- Source sediment
- Source water

Time (days)

Richness



## Small Mesocosms

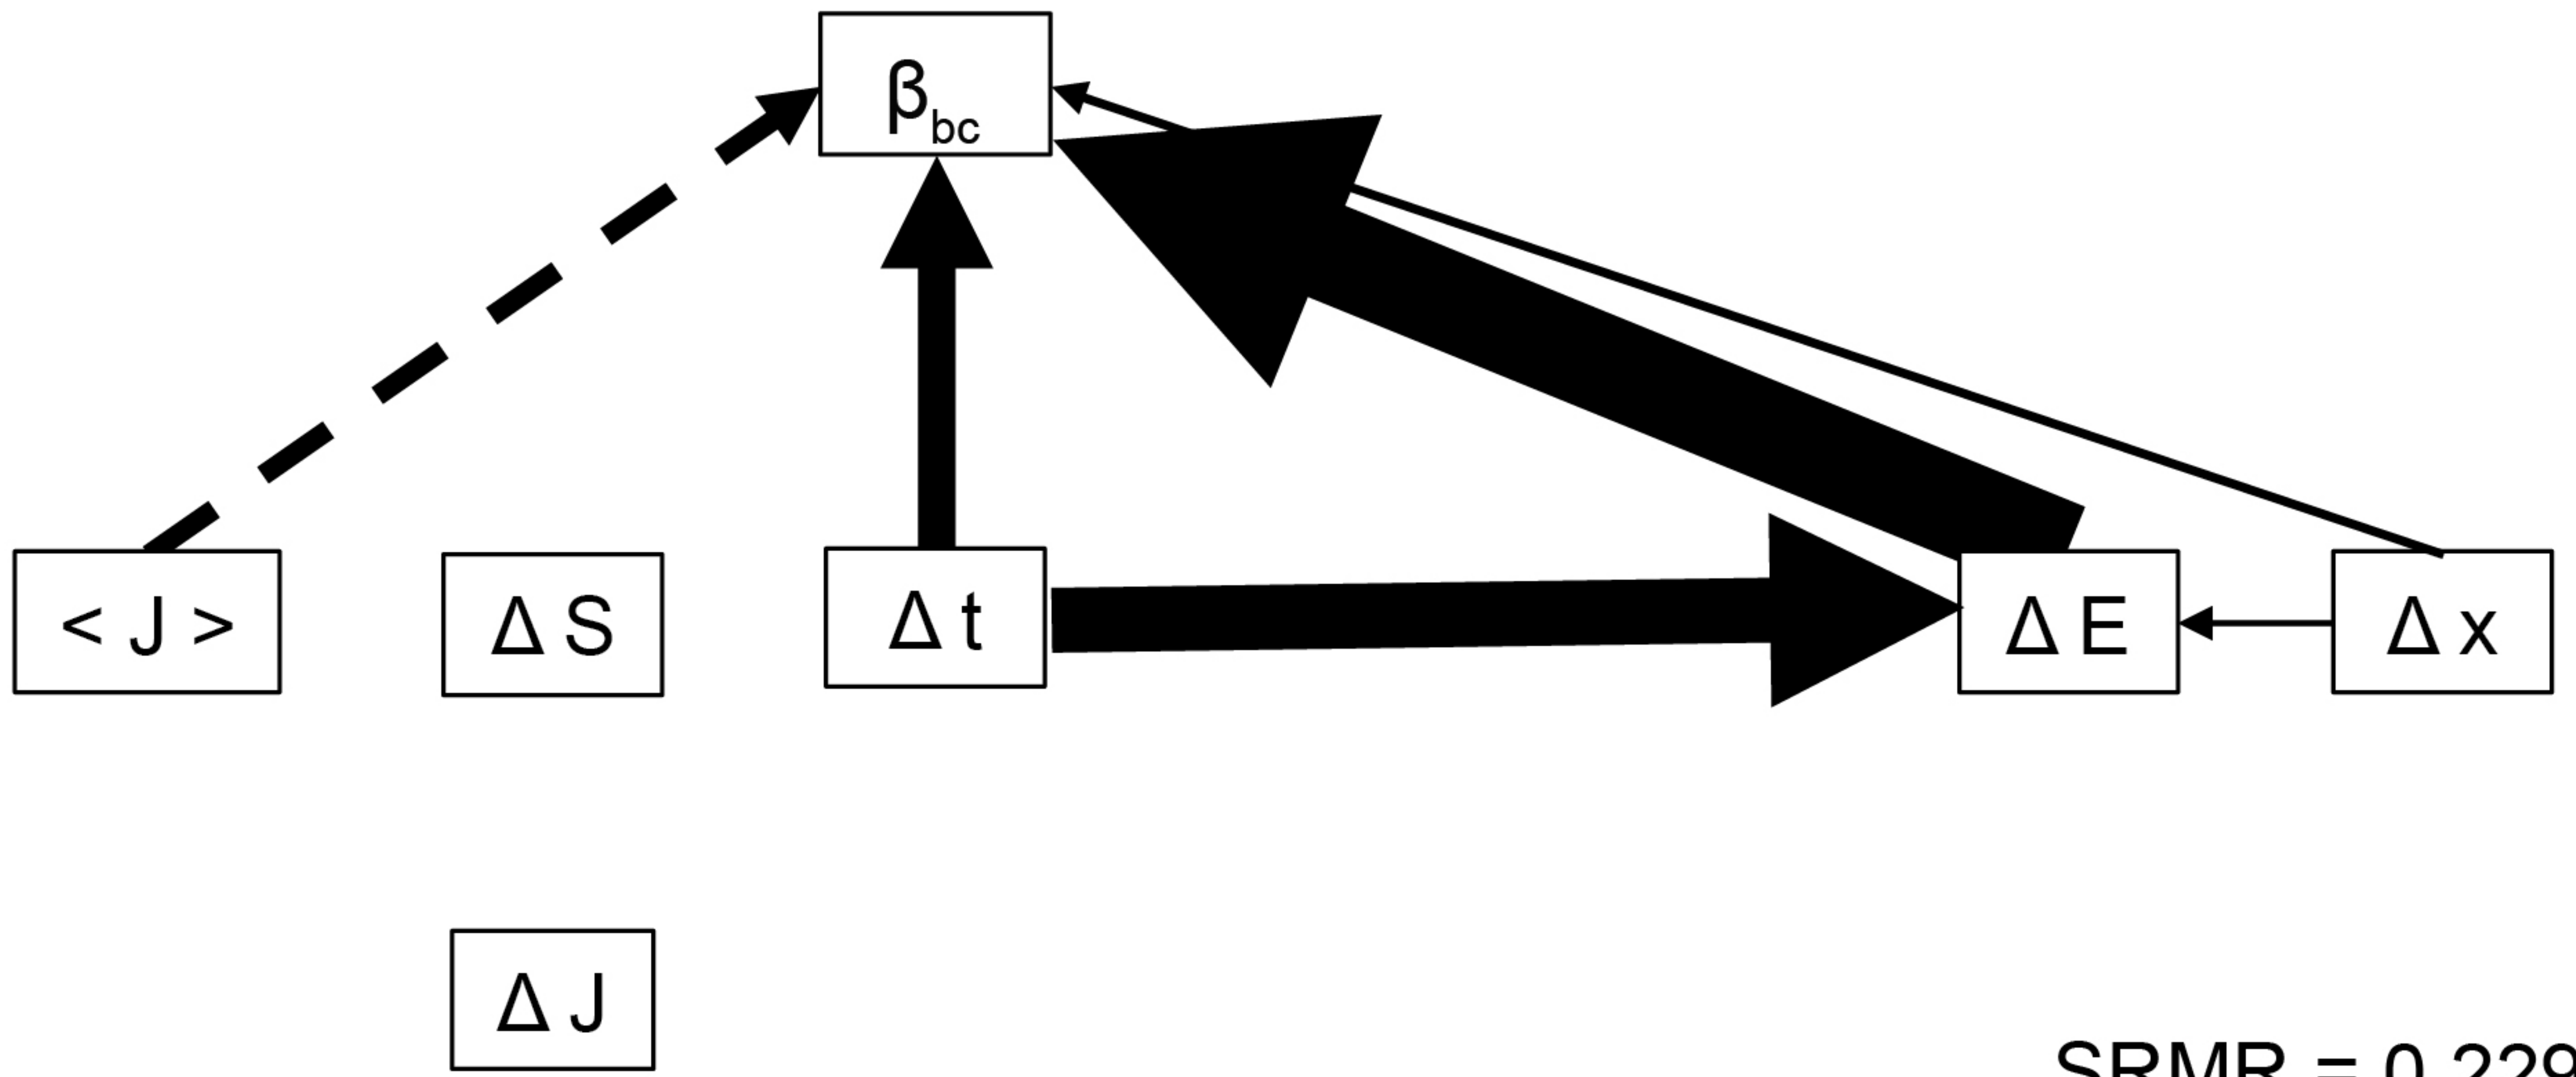

## Medium Mesocosms

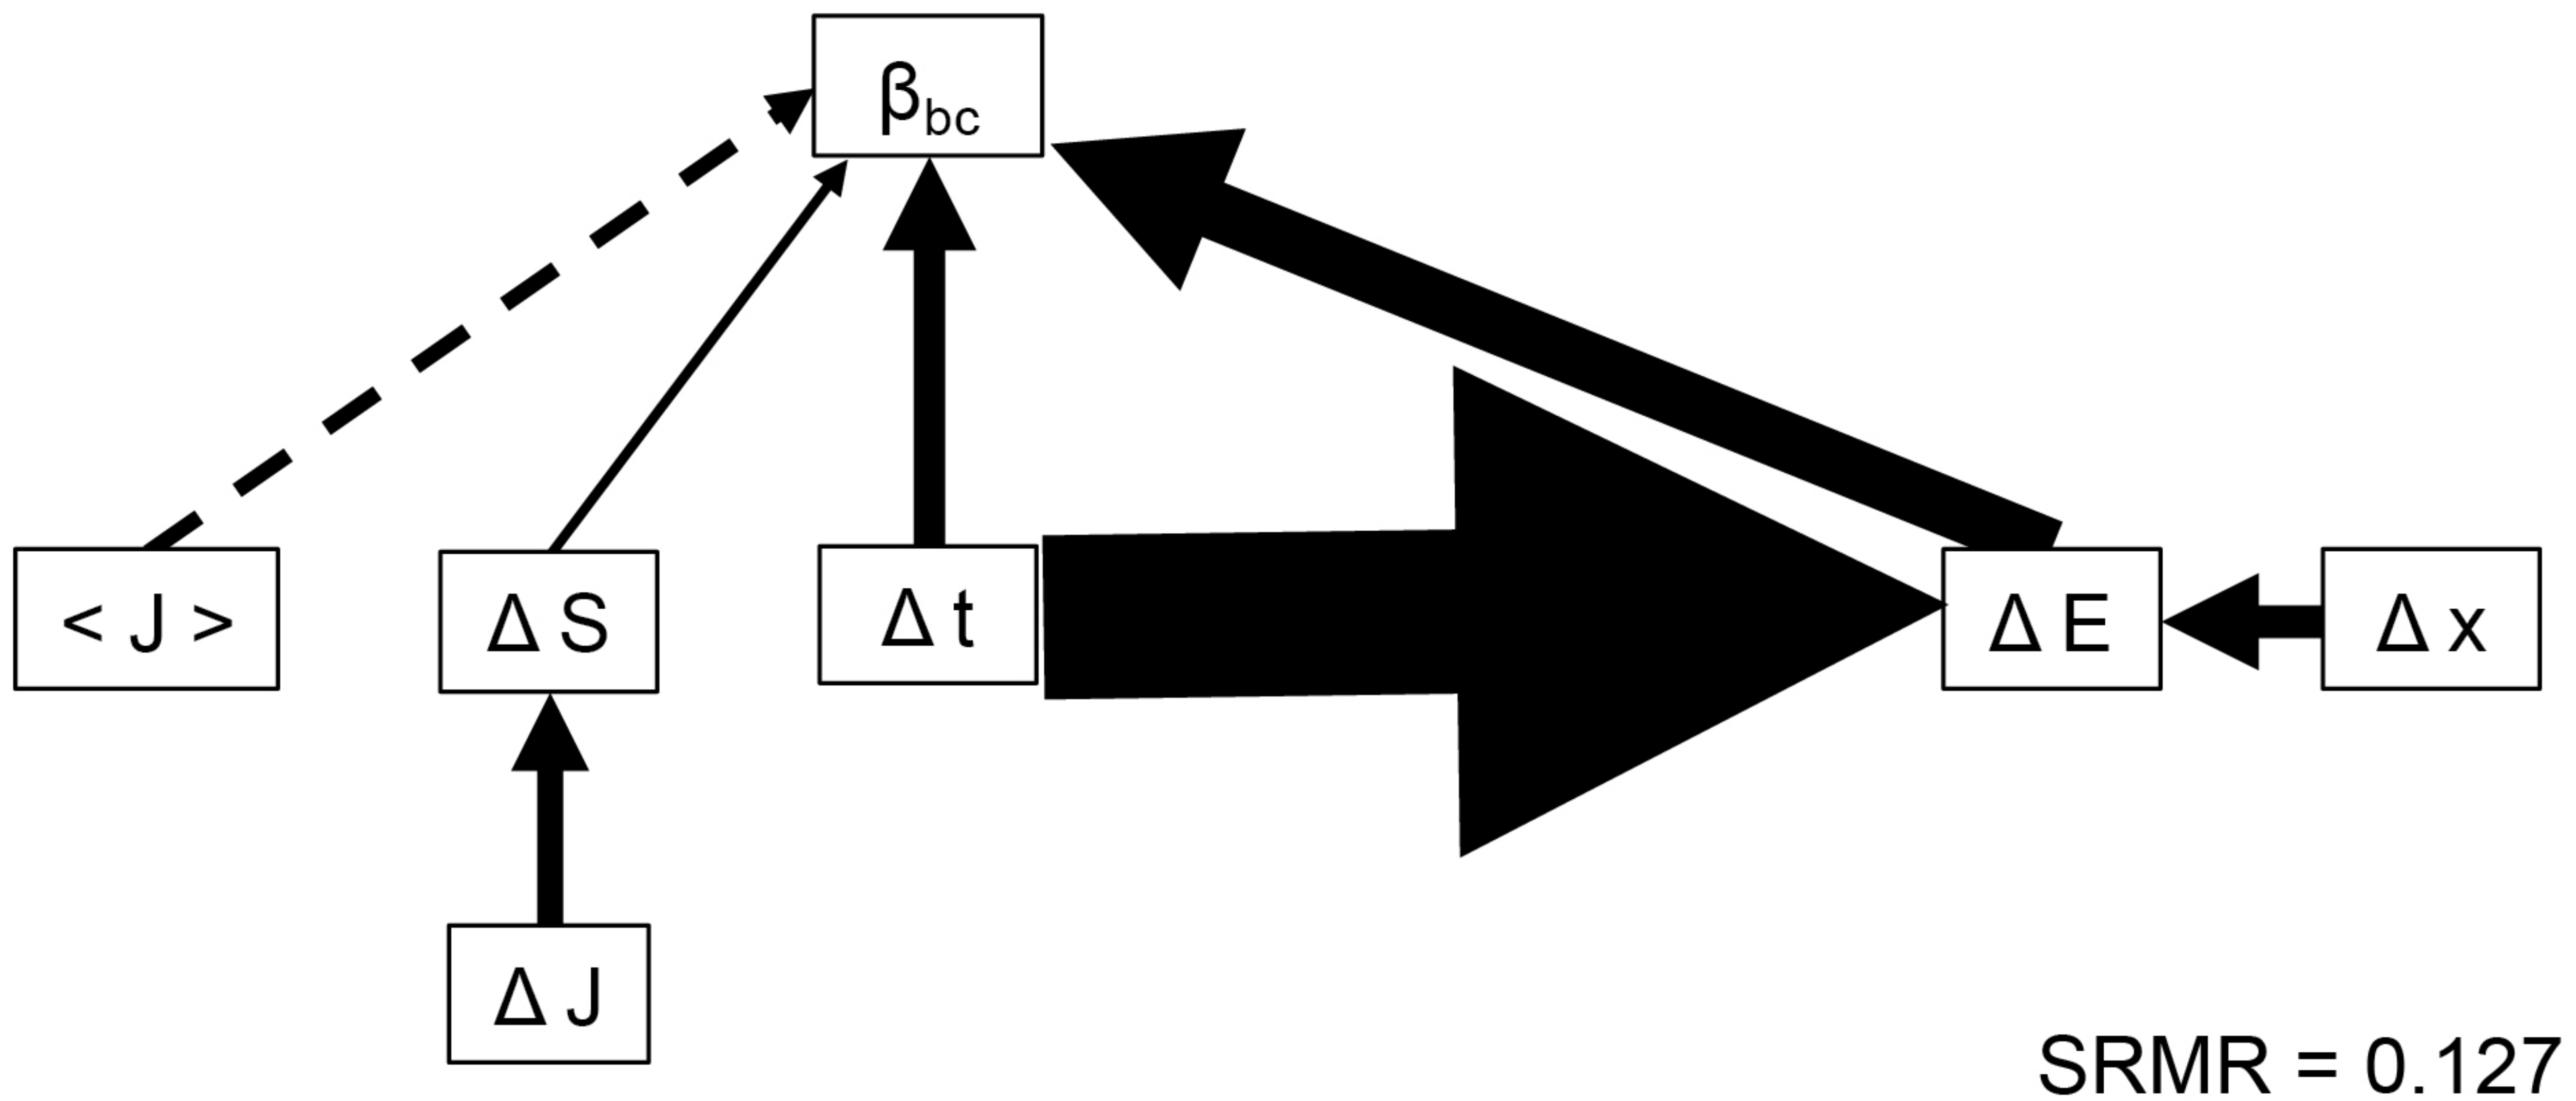

## Large Mesocosms

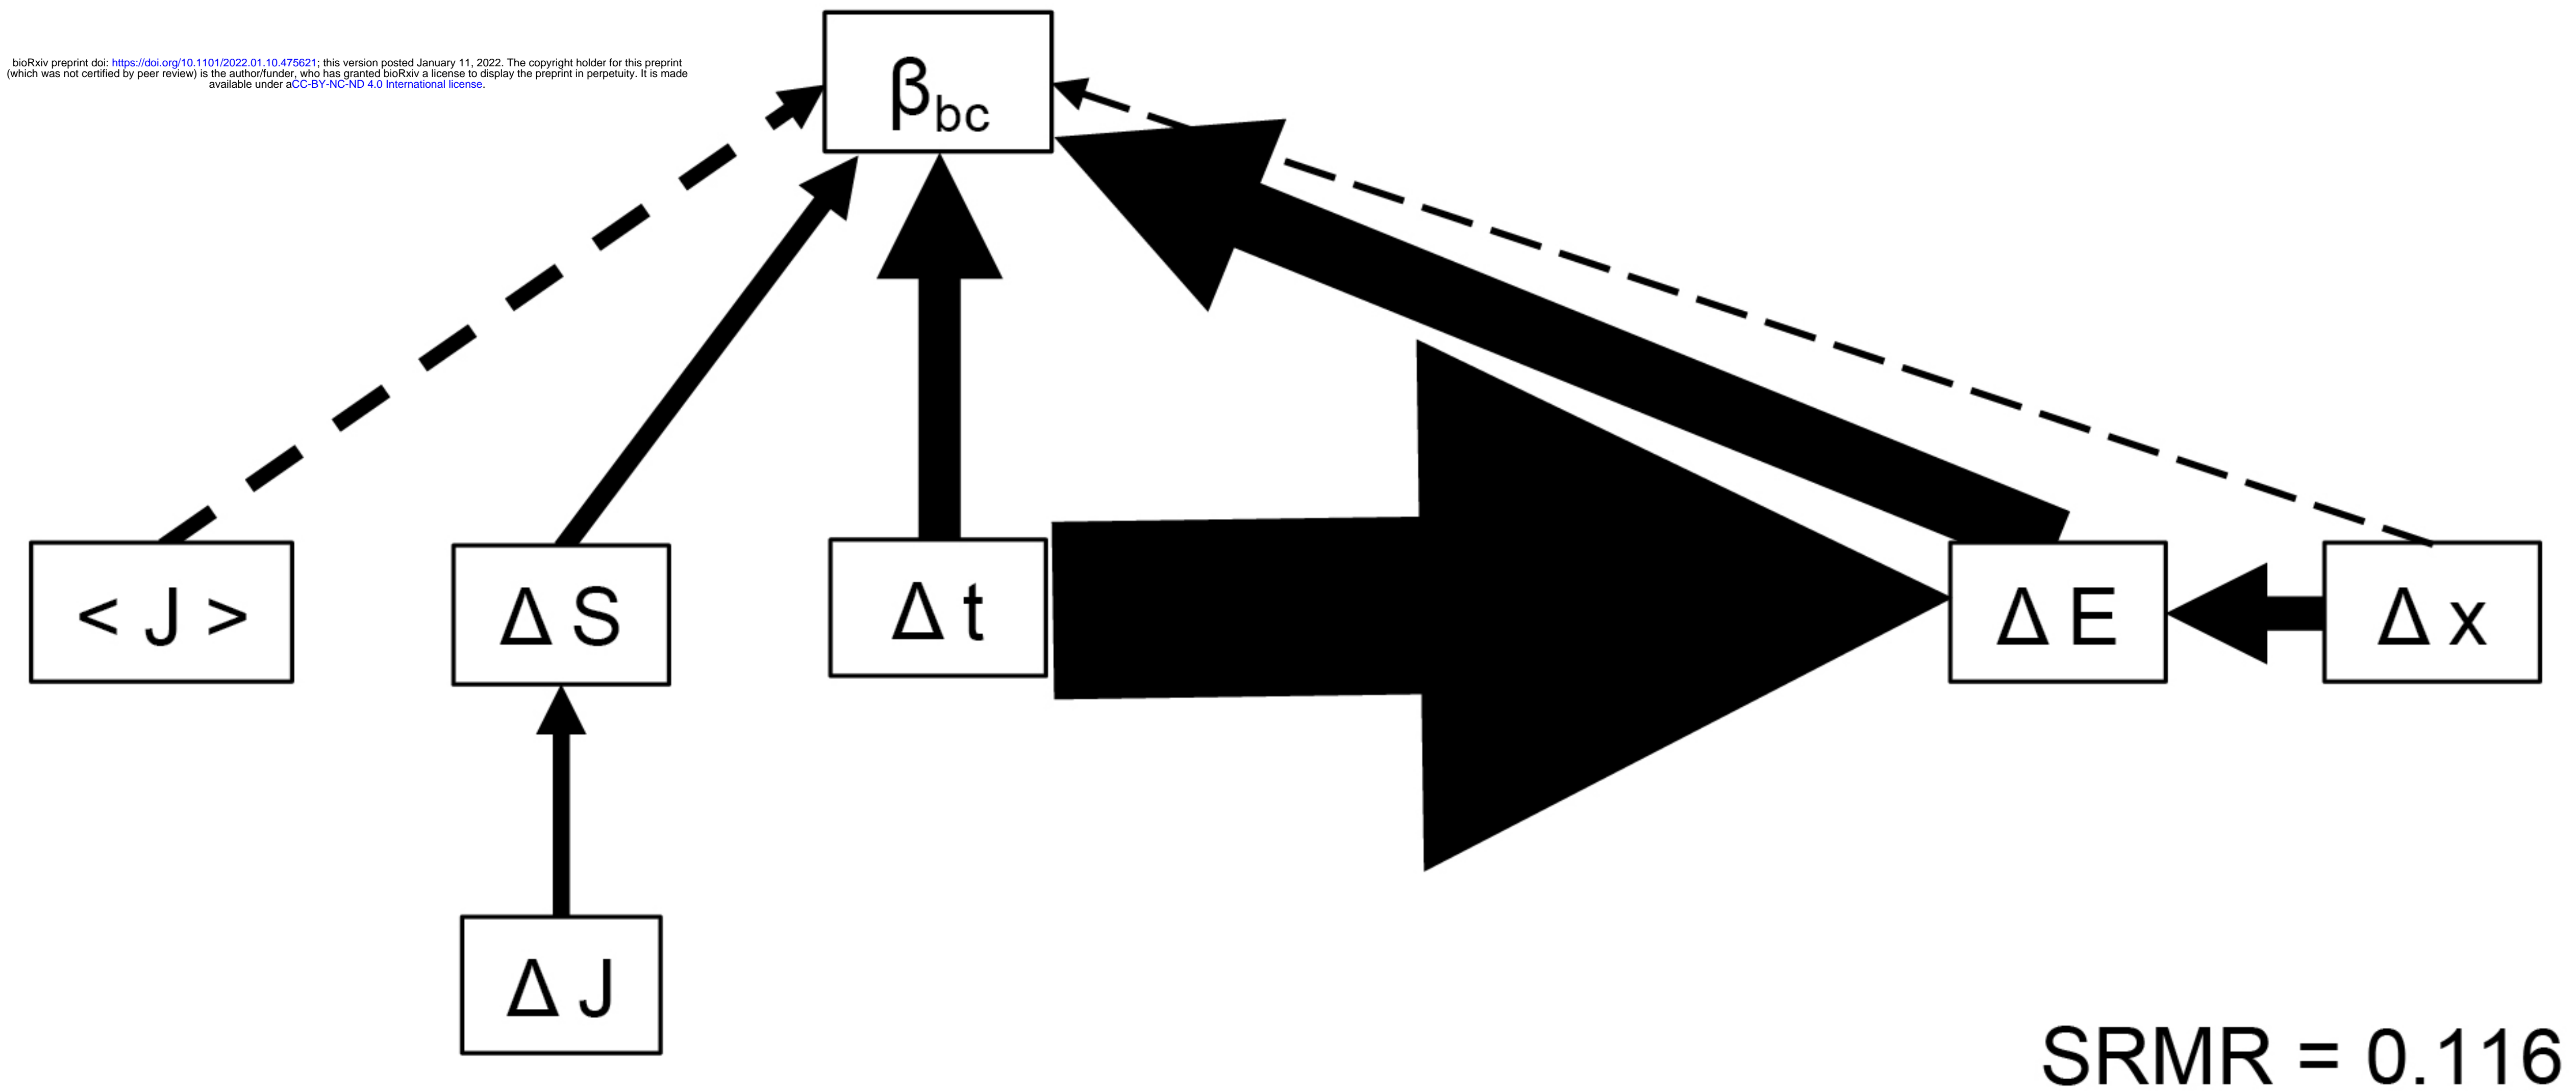



## Small Mesocosms

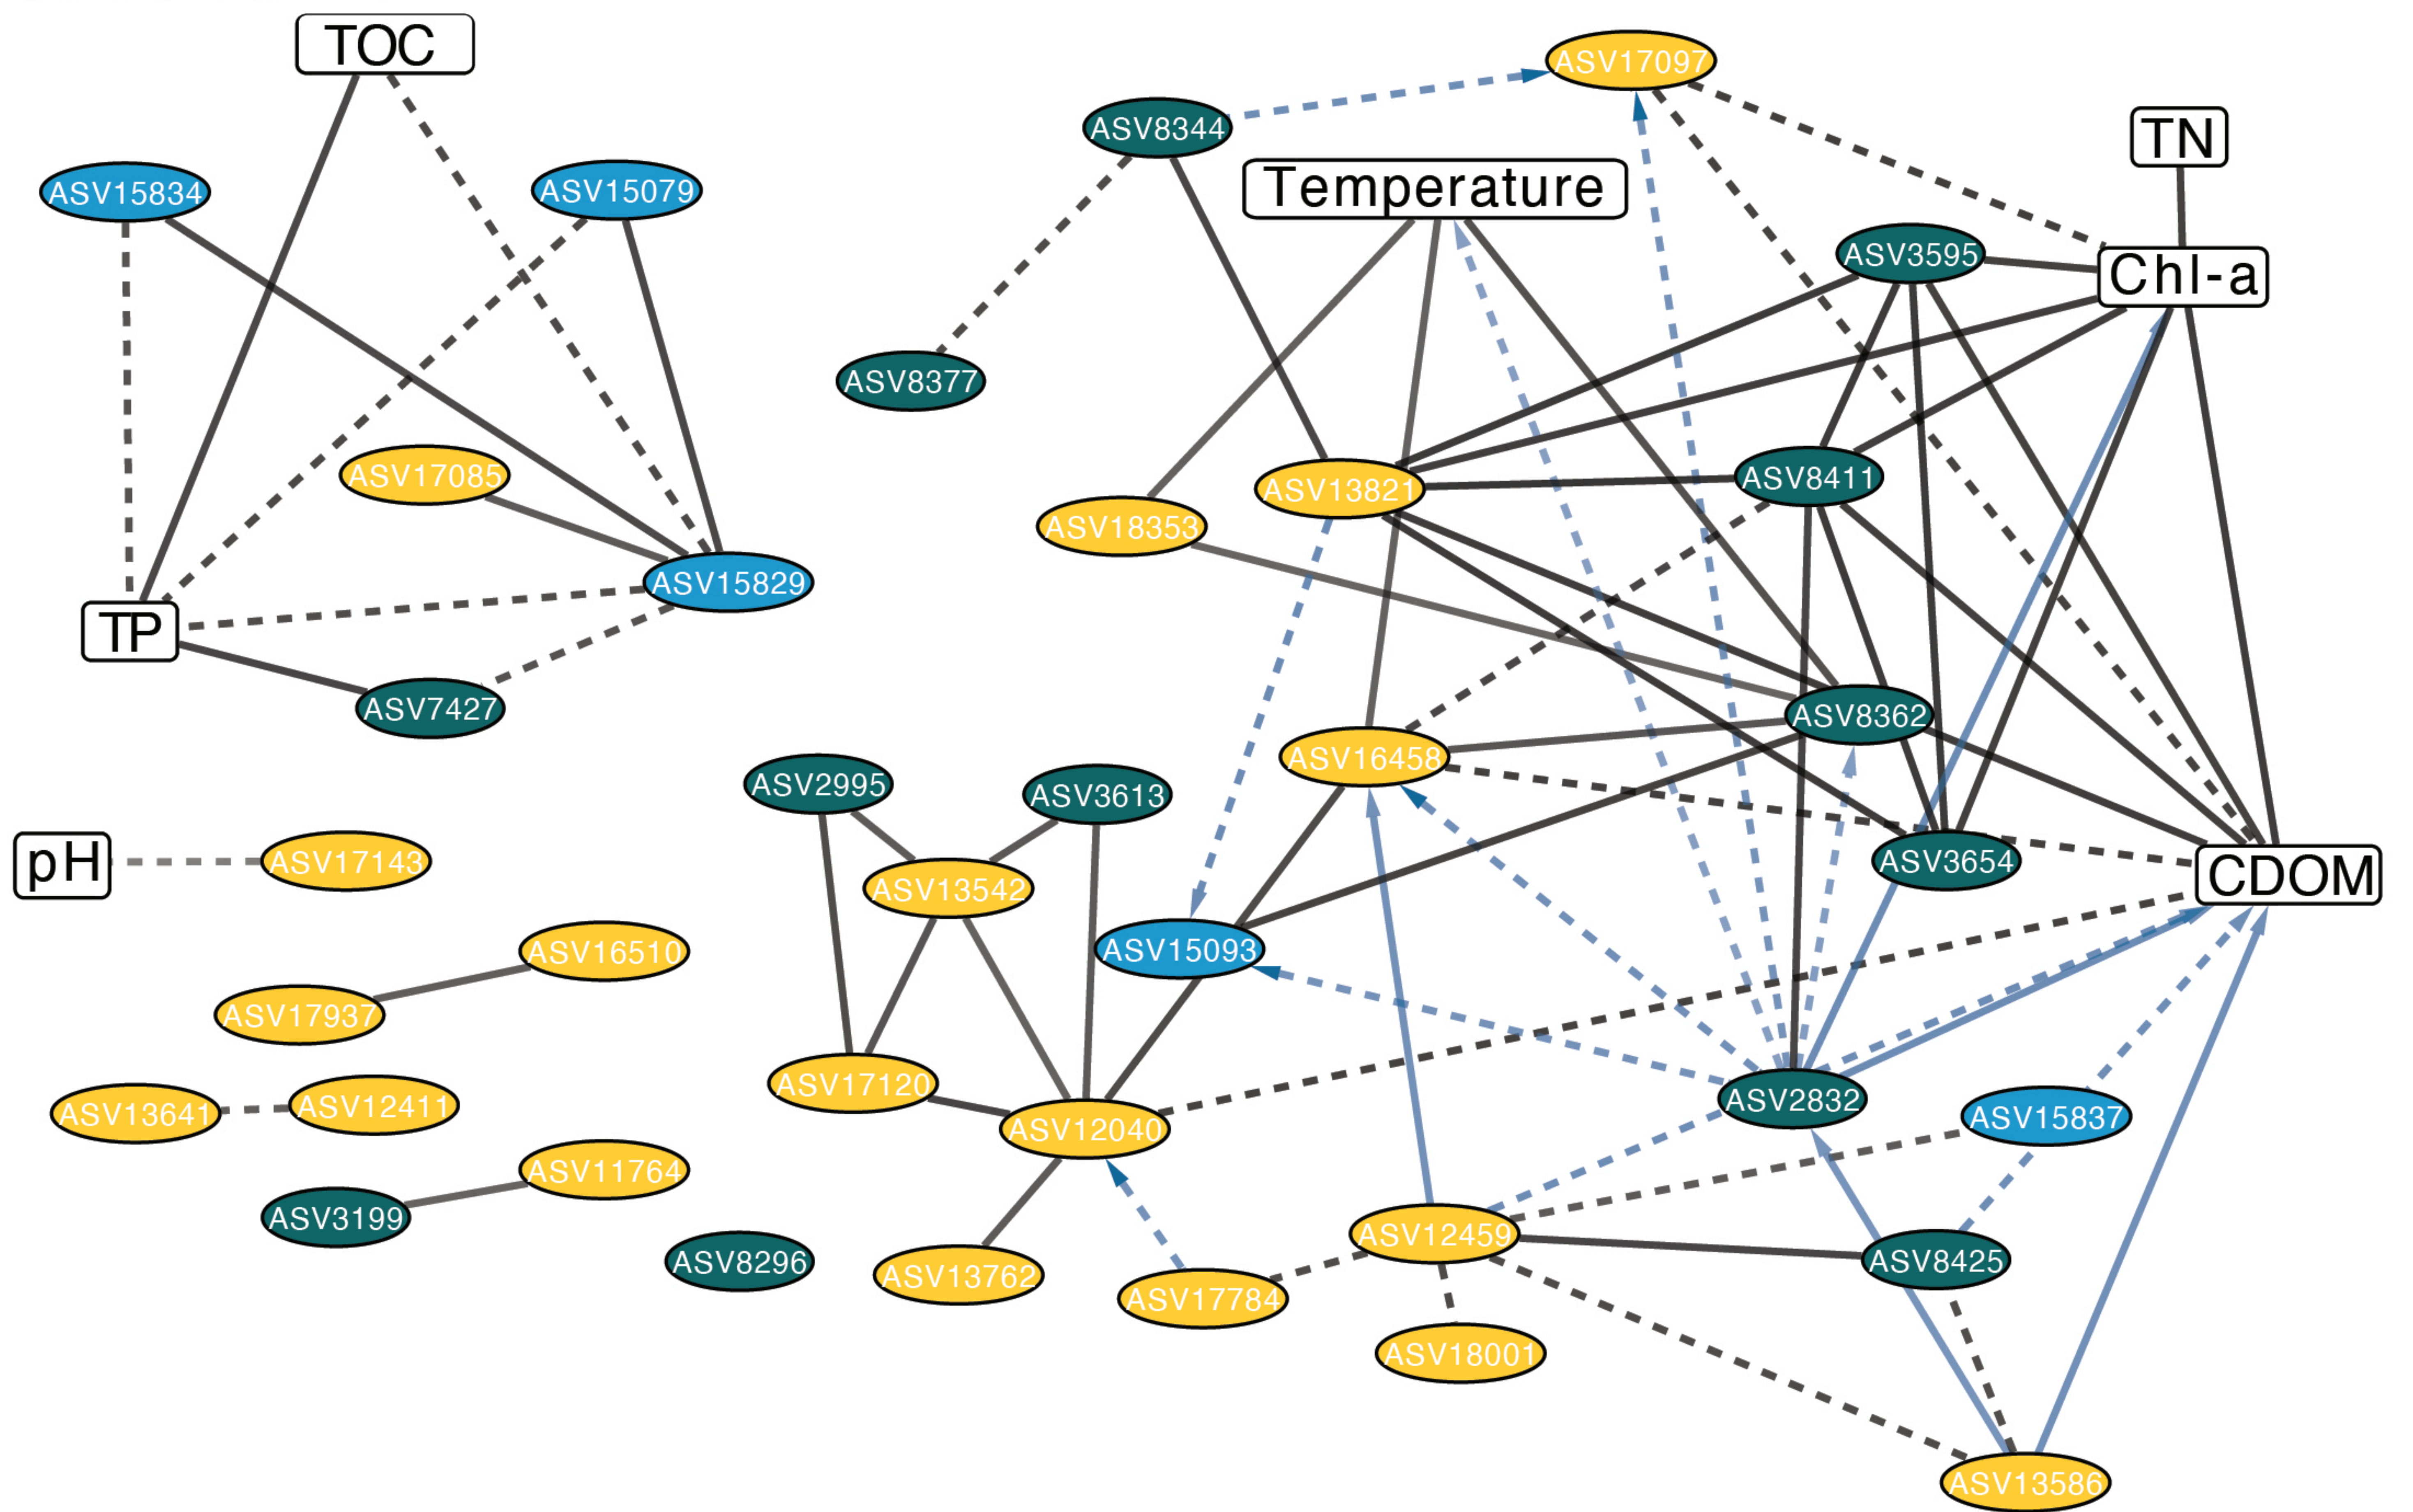

## Medium Mesocosms

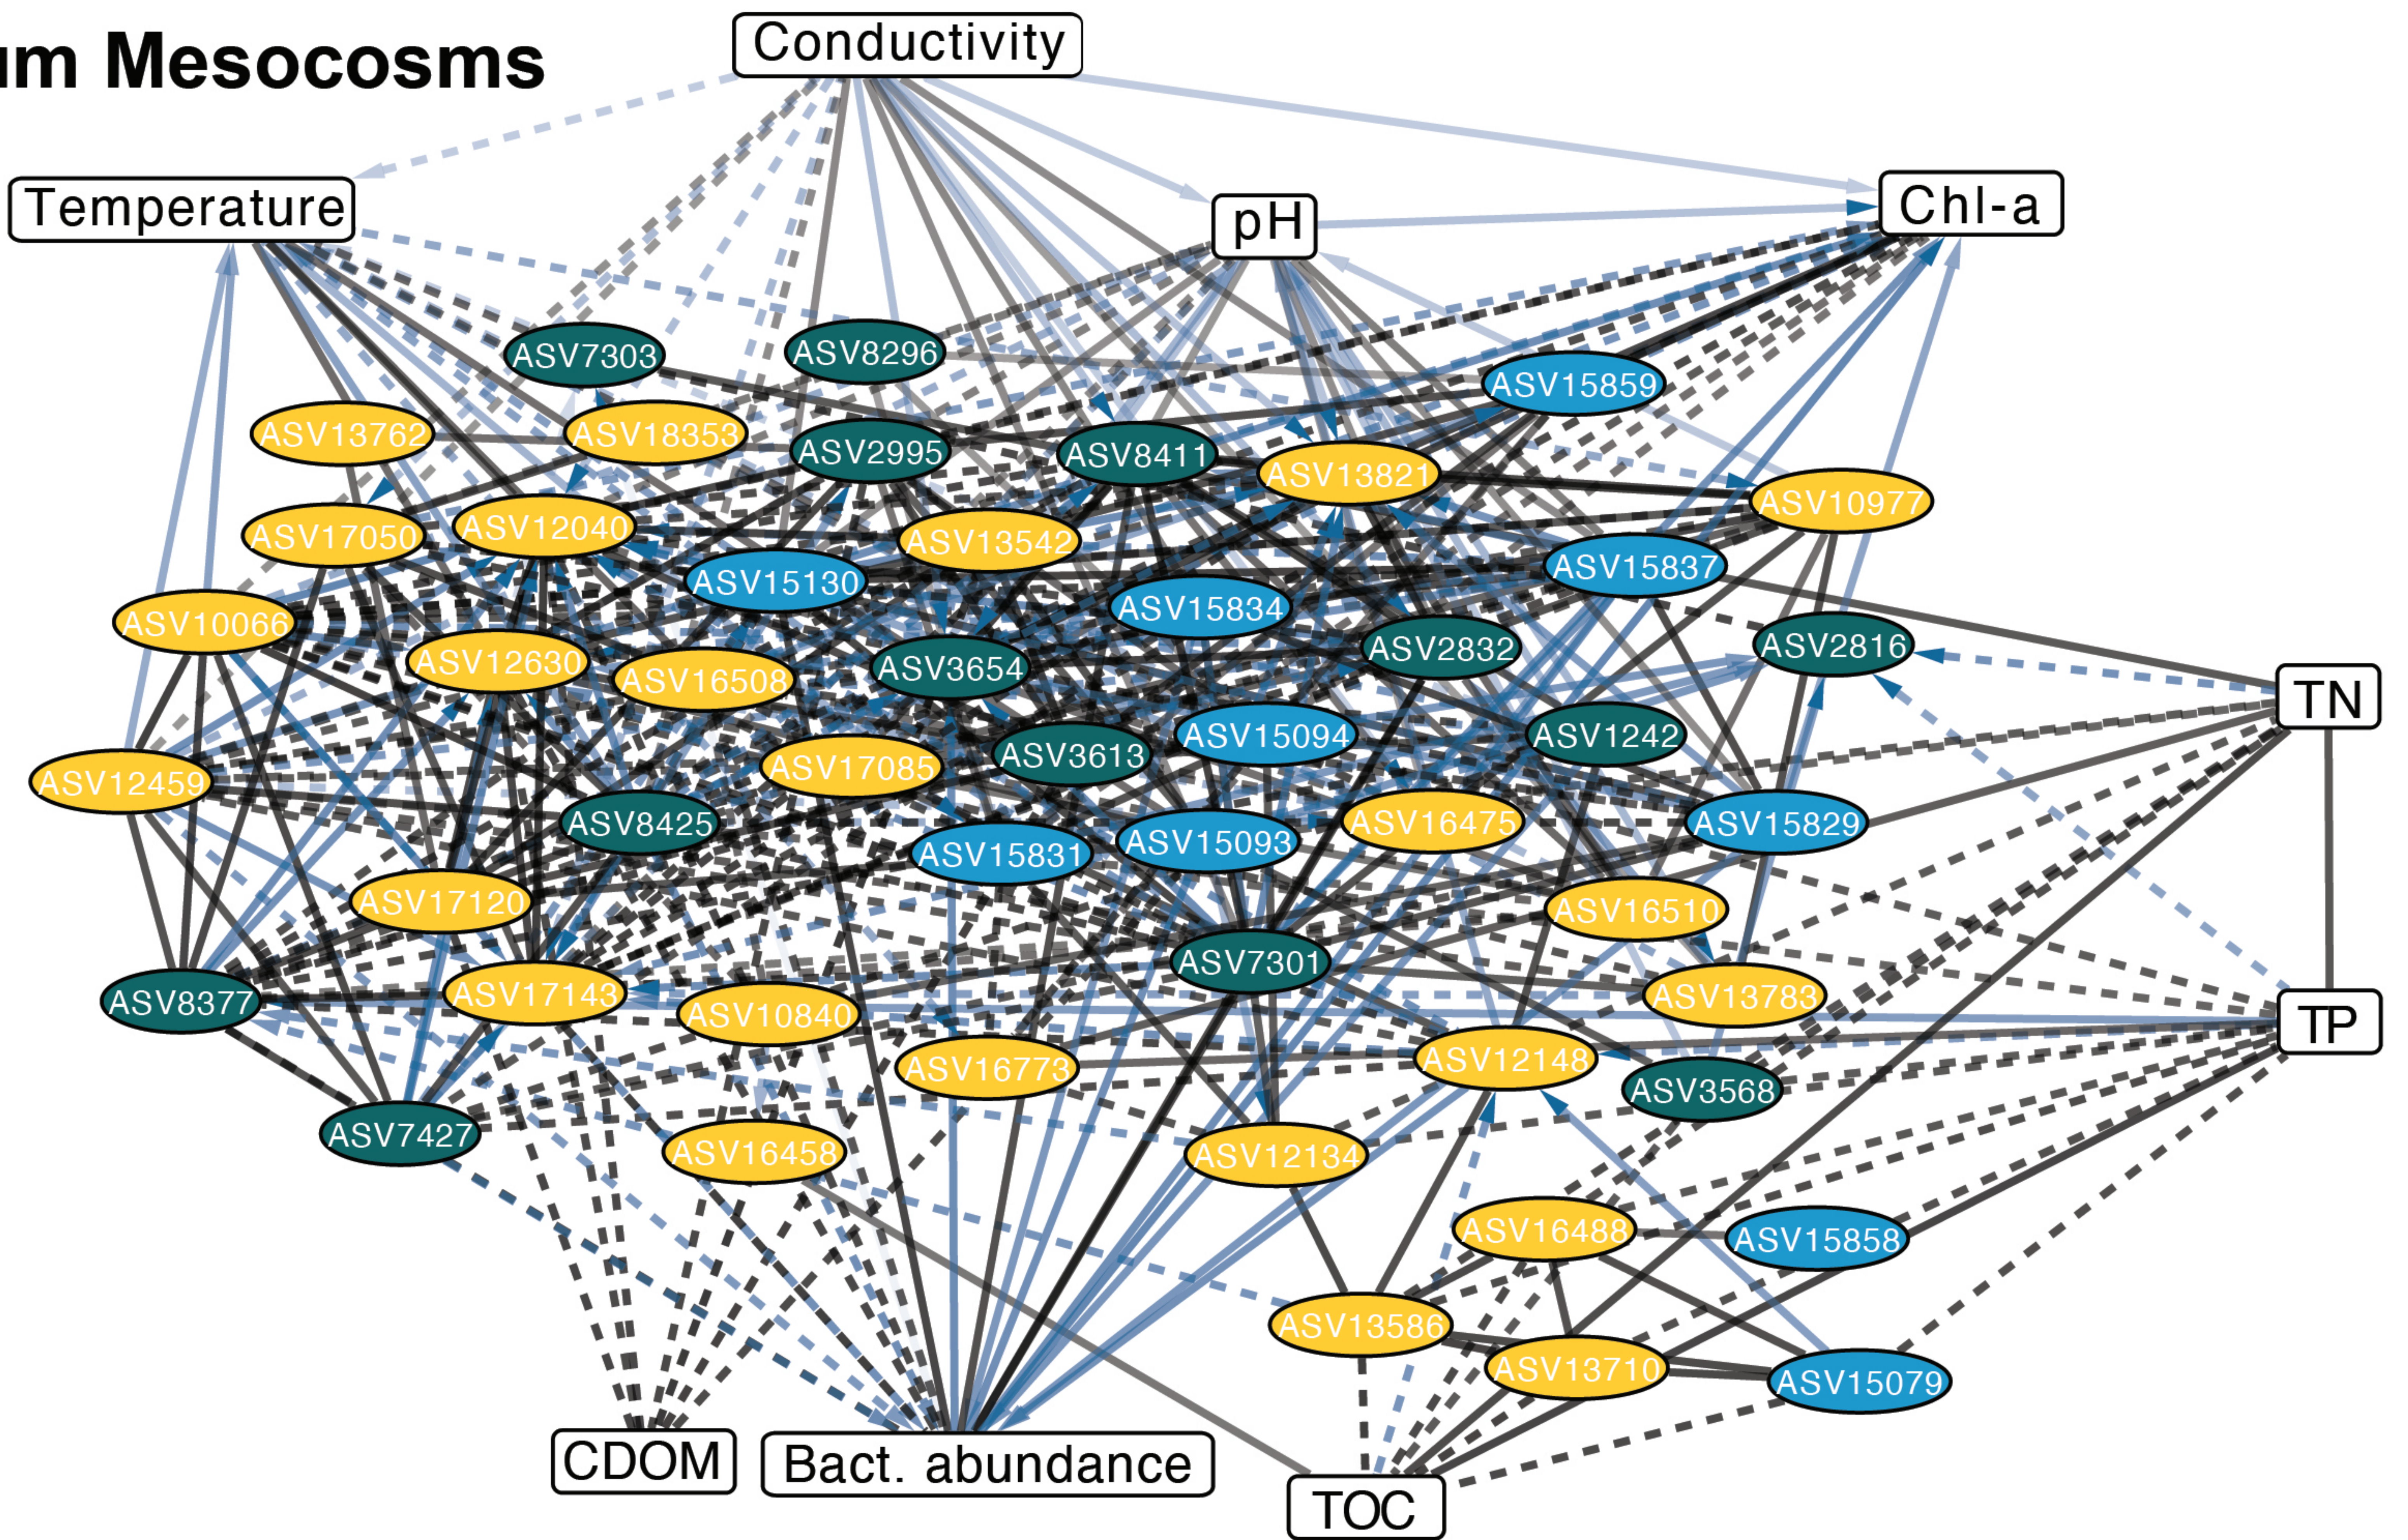

## Large mesocosms

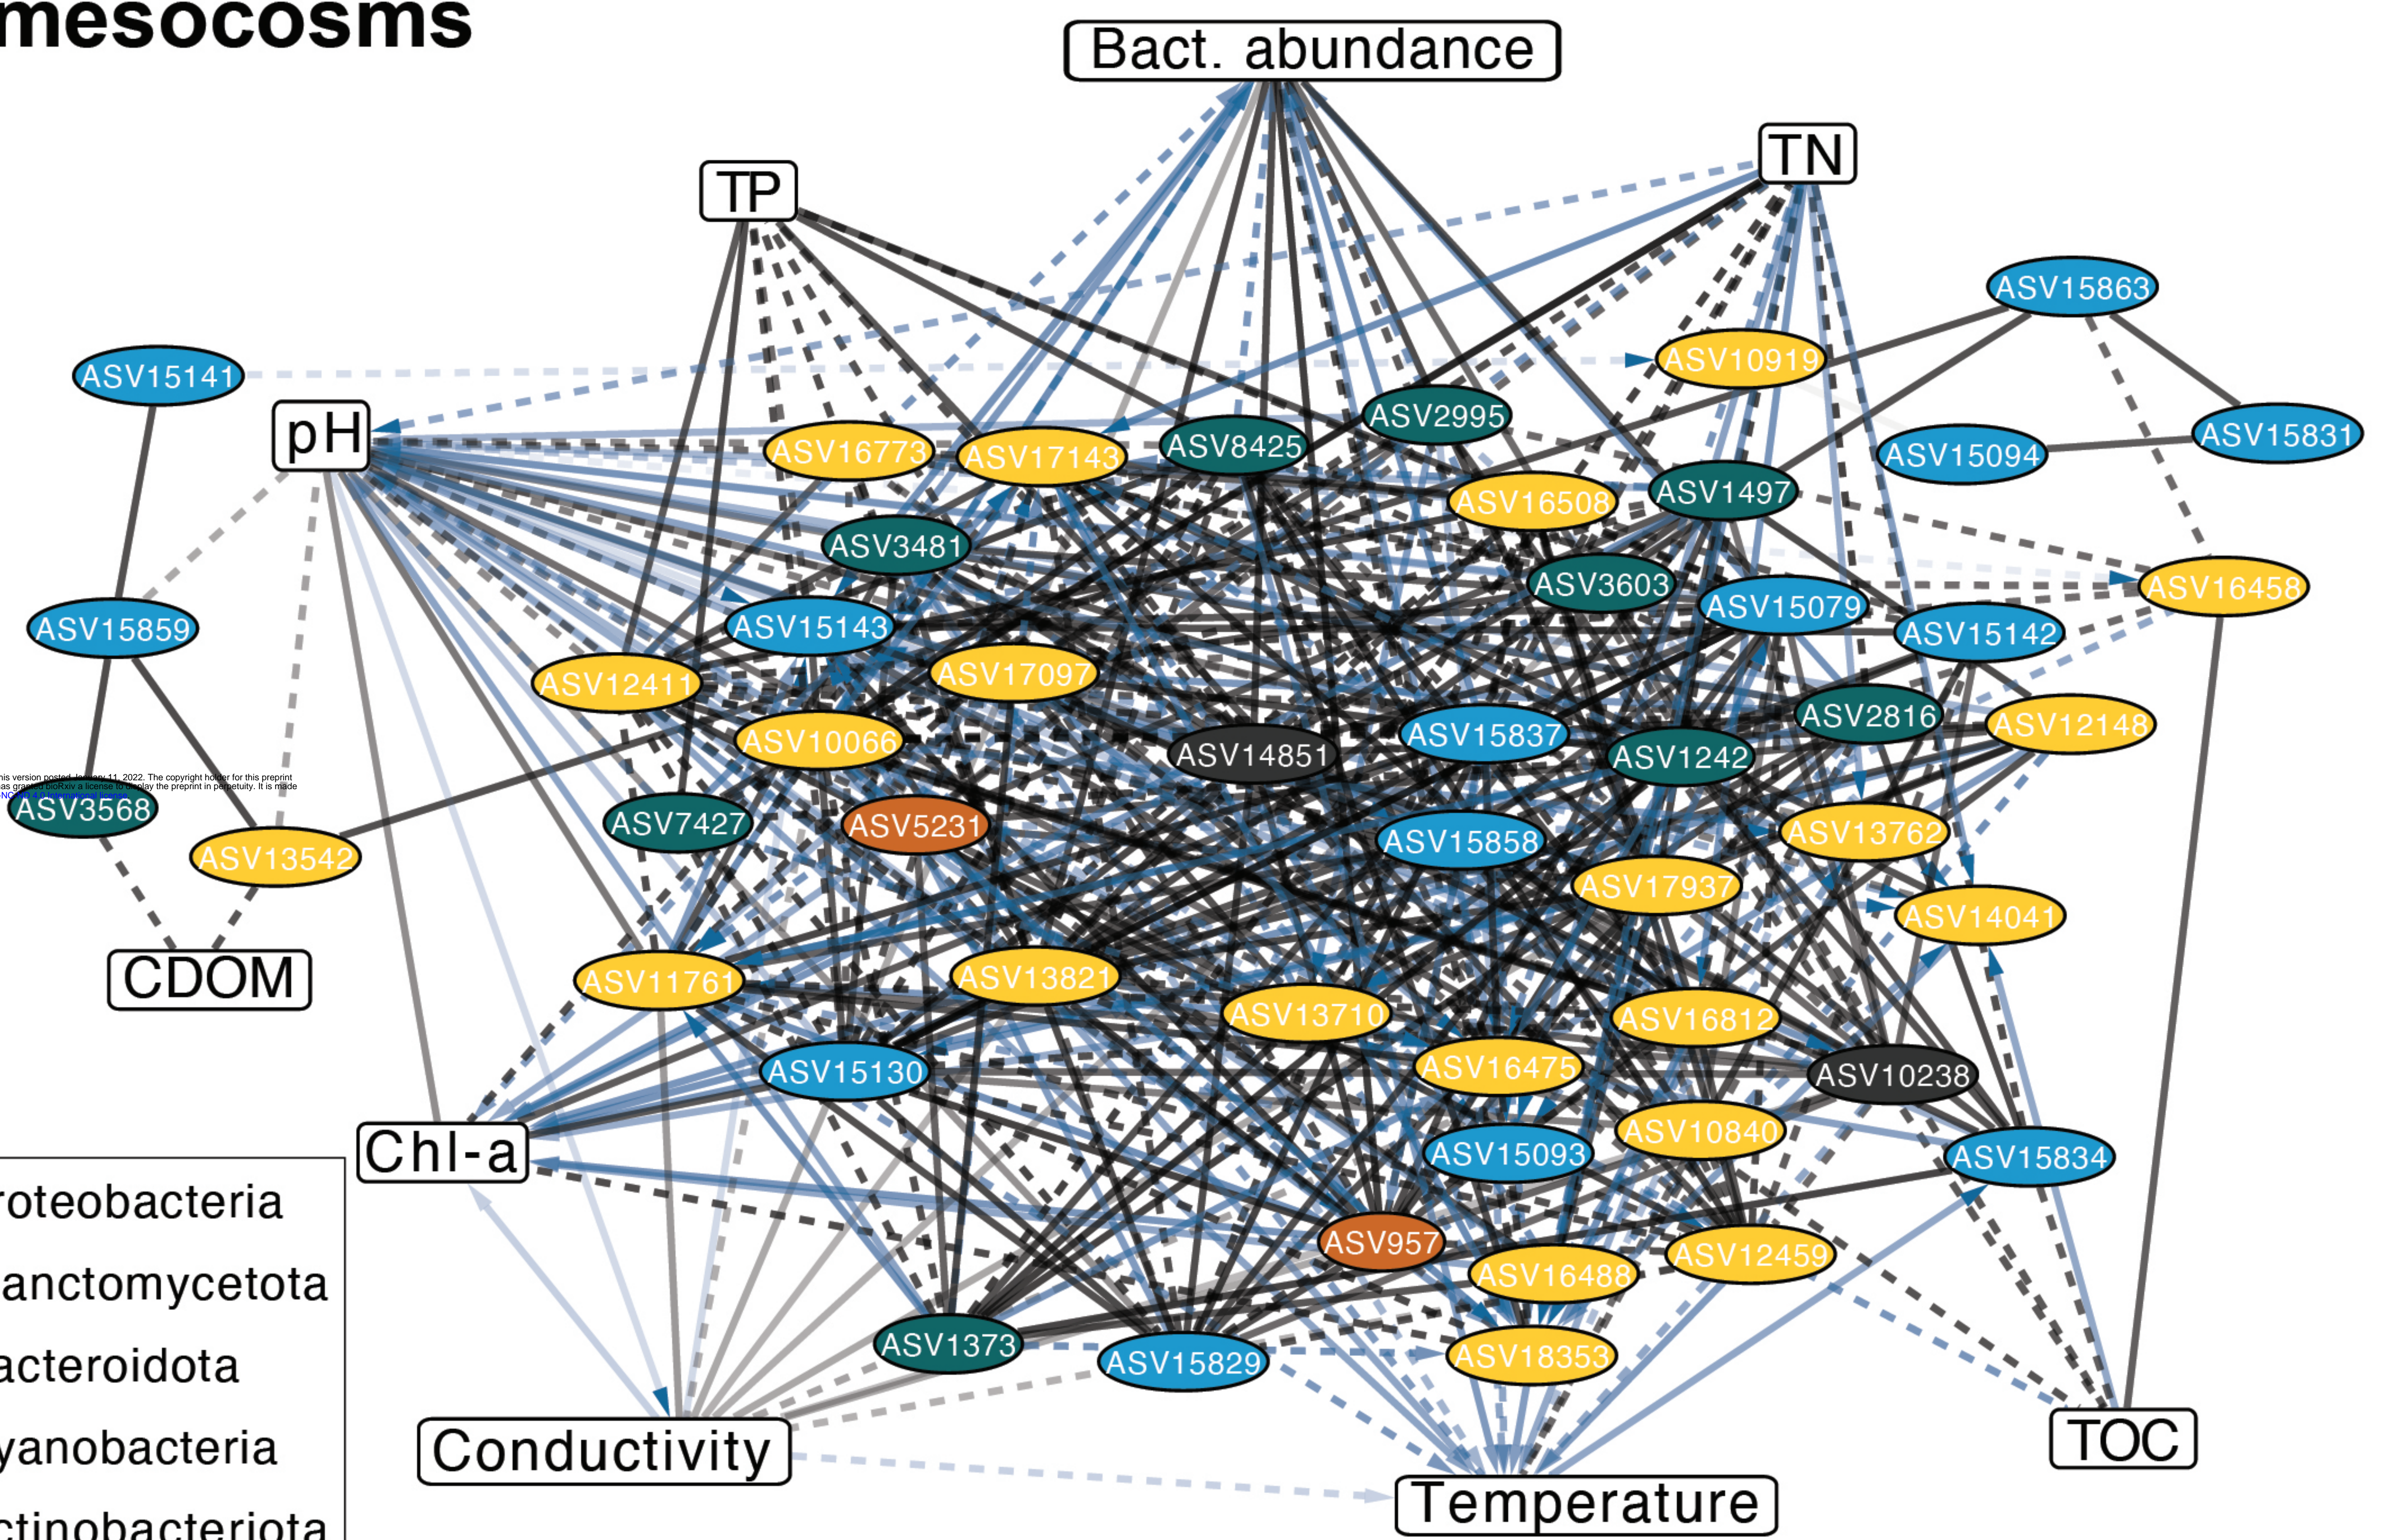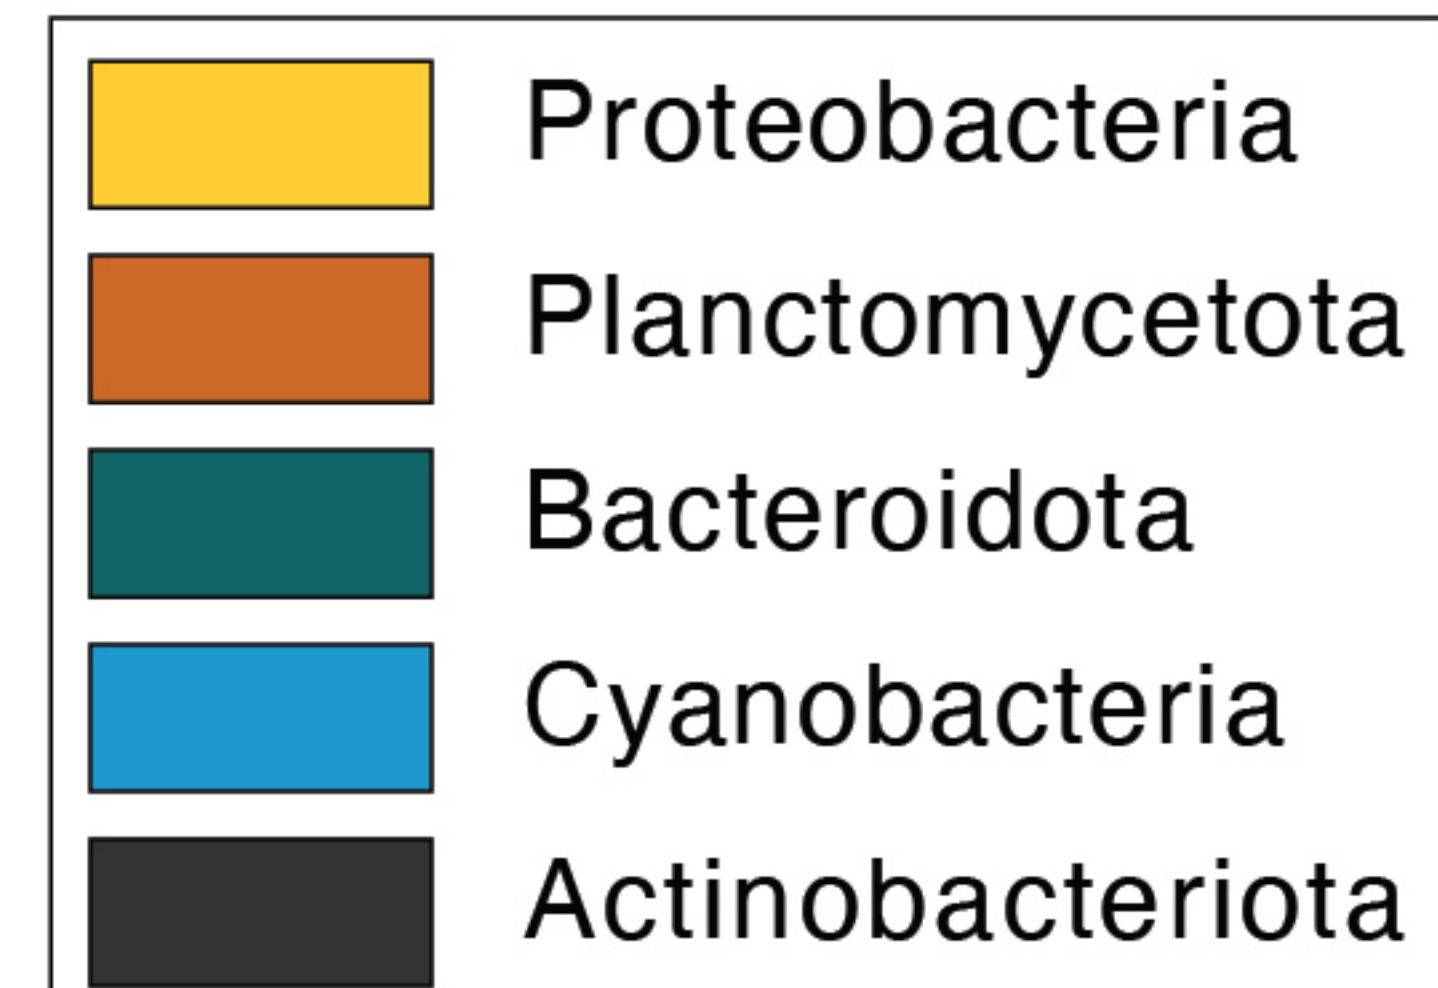



← Environmental fluctuation →

Deterministic force

[salinity press disturbance]

Network properties

→ Ecosystem size →

*bacterial richness*

*turnover ↔ nestedness*

species sorting

*recruitment from water*

*recruitment from sediment*

demographic stochasticity

dispersal limitation

biotic interactions & transient priority effects

*Network centralization*

*Time-shifted associations*

*Network connectivity, nr. of nodes & edges*

bioRxiv preprint doi: <https://doi.org/10.1101/2022.01.10.475621>; this version posted January 11, 2022. The copyright holder for this preprint (which was not certified by peer review) is the author/funder, who has granted bioRxiv a license to display the preprint in perpetuity. It is made available under aCC-BY-NC-ND 4.0 International license.
